1

2 Discrete Roles of the Ir76b Ionotropic Co-Receptor Impact Olfaction, Blood Feeding,  
3 and Mating in the Malaria Vector Mosquito *Anopheles coluzzii*

4

5

6 Zi Ye<sup>1,2¶</sup>, Feng Liu<sup>1¶</sup>, Huahua Sun<sup>1</sup>, Adam Baker<sup>1</sup>, Laurence J. Zwiebel<sup>1\*</sup>

7 <sup>1</sup> Department of Biological Sciences, Vanderbilt University, 465 21<sup>st</sup> Avenue South,  
8 Nashville, TN 37235, USA.

9 <sup>2</sup> Department of Plant Pathology, College of Agriculture, Guizhou University, Guiyang,  
10 China

11

12

13

14

15 ¶ These authors contributed equally to this work.

16 \* Corresponding Author: LJ Zwiebel, Department of Biological Sciences 6260  
17 BSB/MRBIII Vanderbilt University, 465 21st Ave. South Nashville, TN 37232, USA,  
18 telephone: 615-3431894. Email: [l.zwiebel@vanderbilt.edu](mailto:l.zwiebel@vanderbilt.edu)

19

20 Classification: BIOLOGICAL SCIENCES/Genetics

21 Keywords: *Anopheles coluzzii*; Olfaction; Ionotropic receptor; Electrophysiology; Blood  
22 feeding.

## 23 **Abstract**

24           Anopheline mosquitoes rely on their highly sensitive chemosensory apparatus to  
25 detect diverse chemical stimuli that drive the host-seeking and blood-feeding behaviors  
26 required to vector pathogens for malaria and other diseases. This process incorporates  
27 a variety of chemosensory receptors and transduction pathways. We have used  
28 advanced *in vivo* gene-editing and -labelling approaches to localize and functionally  
29 characterize the ionotropic co-receptor *Aclr76b* in the malaria mosquito *Anopheles*  
30 *coluzzii*, where it impacts both olfactory and gustatory systems. *Aclr76b* has a broad  
31 expression pattern in female adult antennal grooved pegs, T1 and T2 sensilla on the  
32 labellum, stylets, and tarsi, as well as the larval sensory peg. *Aclr76b* is co-localized  
33 with the Orco odorant receptor (OR) co-receptor in a subset of cells across the female  
34 antennae and labella. In contrast to *Orco* and *Ir8a*, chemosensory co-receptors that  
35 appear essential for the activity of their respective sets of chemosensory neurons in  
36 mosquitoes, *Aclr76b*<sup>-/-</sup> mutants maintain wild-type peripheral responses to volatile  
37 amines on the adult palps, labellum, and the larval sensory cone. Interestingly, *Aclr76b*<sup>-/-</sup>  
38 mutants display significantly increased responses to amines in antennal grooved peg  
39 sensilla while coeloconic sensilla reveal significant deficits in responses to several acids  
40 and amines. Behaviorally, *Aclr76b* mutants manifest significantly female-specific  
41 insemination deficits and, although *Aclr76b*<sup>-/-</sup> mutant females are able to locate, alight,  
42 and probe artificial blood hosts, they are incapable of blood feeding successfully. Taken  
43 together, our study reveals a multi-dimensional functionality of *Ir76b* in Anopheline  
44 olfactory and gustatory pathways that directly impacts the vectorial capacity of these  
45 mosquitoes.

## 46 **Summary**

47           Chemosensory receptors play crucial roles across mosquito lifecycles where they  
48 often form functional complexes that require cognate co-receptors. To better understand  
49 mosquito chemosensory pathways in the malaria vector mosquito *An. coluzzii* we have  
50 utilized advanced gene editing approaches to localize and functionally characterize the  
51 ionotropic receptor co-receptor *Aclr76b*. Expression of *Aclr76b* was observed in  
52 antennal grooved pegs and other accessory olfactory appendages. Mutagenesis of  
53 *Aclr76b* uncovers both reduced and elevated neuronal responses to amines, which  
54 suggests a role in response modulation. In addition to olfactory phenotypes, *Aclr76b*  
55 mutants display significantly impaired mating and blood feeding capabilities. Our data  
56 reveals discrete roles of *Aclr76b* across olfactory and gustatory pathways and shed  
57 lights on the potential molecular target for vector control strategies.

## 58 Introduction

59 The malaria mosquito *Anopheles coluzzii* (recently renamed from the “M” form of  
60 *An. gambiae* (1)) is a major vector of human malaria pathogens in subSaharan Africa  
61 that are transmitted during blood feeding by adult females (2). Anophelines and other  
62 mosquitoes locate blood-meal hosts through detection of a variety of environmental and  
63 host-derived cues, among which olfactory signals have great significance at both long  
64 and short range (3, 4). On the head of adult mosquitoes, the primary olfactory  
65 appendages include the antennae, maxillary palps and labella, which are covered by a  
66 range of hair-like protrusions, known as sensilla (5–8). One or more bipolar olfactory  
67 sensory neurons (OSNs) innervate a typical chemosensory sensillum where their  
68 dendrites extend apically and are bathed within an aqueous lymph (8, 9). Three large  
69 gene families encode the distinct molecular receptors that underlie olfaction in  
70 mosquitoes and other insects; these include odorant receptors (ORs), ionotropic  
71 receptors (IRs), and gustatory receptors (GRs) (4). These receptors are expressed on  
72 the dendritic membranes of diverse sets of chemosensory neurons, where they  
73 generate action potentials in response to a broad spectrum of chemical stimuli (5, 7,  
74 10–13). Three major morphological types of olfactory sensilla are present on the  
75 mosquito antennae: trichoid, basiconic (also known as grooved peg), and coeloconic  
76 sensilla (9, 14). In *An. coluzzii*, while there is a range of functional variations within each  
77 type of sensillum, trichoid sensilla generally respond to a broad spectrum of odorants,  
78 while both grooved pegs and coeloconic sensilla appear to be more narrowly tuned to  
79 both amines and acids (6, 15, 16).

80           While molecularly unrelated, mosquito ORs and IRs are both ligand-gated  
81 heteromeric channels composed of tuning subunits along with one or more highly  
82 conserved co-receptor subunits (17–20). The tuning subunit is responsible for the  
83 specificity of the receptor while the co-receptor maintains the structural integrity and is  
84 crucial for the receptor function (19–21). Knockout (null) mutants of the odorant receptor  
85 co-receptor (*Orco*) in *Aedes aegypti* and *An. coluzzii* result in a dramatic decrease in  
86 sensitivity to a variety of human and other odors; however, importantly, humans  
87 remain attractive to host-seeking *Orco*<sup>-/-</sup> mutants, highlighting the involvement of other  
88 odorant signaling pathways and sensory modalities (21, 22).

89           In *Drosophila*, antennal IRs are primarily expressed in the coeloconic sensilla  
90 (18). Unlike ORs, which rely solely on the *Orco* co-receptor, three IRs—Ir8a, Ir25a, and  
91 Ir76b—function as IR co-receptors (18, 19). Interestingly, each DmIR co-receptor is  
92 associated with distinct odor preferences; *Dmlr8a* is critical for acid sensitivity, whereas  
93 *Dmlr25a* and *Dmlr76b* are both responsible for amine detection (18, 23, 24). In addition  
94 to olfactory function, Ir76b and Ir25a are also involved in other sensory modalities and  
95 pathways. In *Drosophila*, *Dmlr76b* has been found to be involved in gustatory  
96 responses to salt and amino acids (25, 26), and *Dmlr25a* acts in both thermosensation  
97 and hydrosensation (27, 28). Furthermore, while *Dmlr25a* and *Dmlr76b* are both co-  
98 expressed with *Dmlr92a* acting as a *Drosophila* ammonia/amine receptor, *Dmlr92a* is  
99 able to function independently of either these co-receptors (24, 29).

100           Recently, several studies focusing on mosquito IRs have revealed that the  
101 homologs to *Drosophila* IR co-receptors similarly regulate a range of *Orco*-independent  
102 sensing pathways. In the arbovirus vector *Ae. aegypti*, *Aelr8a* null mutants lost the

103 neuronal and behavioral responses to acids (30). In *An. coluzzii* larvae, all three IR co-  
104 receptors are expressed on the larval antennae, and RNAi knockdown of *Aclr76b*  
105 specifically impacts larval responses to butylamine (31). In adults, *Aclr76b* is highly  
106 expressed in antennal neurons that do not express ORs (11); in *Xenopus* oocytes it  
107 drives responses to several amines when co-expressed with *Aclr25a* and either *Aclr41a*  
108 and *Aclr41c* (11).

109         To examine the roles and relevance of *Ir76b* in the olfactory system of *An.*  
110 *coluzzii*, we have utilized CRISPR/Cas9-mediated gene editing to establish an *Aclr76b*-  
111 *QF2* driver and *Aclr76b* null mutant lines. Localization studies using the driver within a  
112 binary Q system (32) reveal that *Aclr76b* is robustly expressed in antennal grooved  
113 pegs, labella, stylets and tarsi of adult females, as well in the larval antennae where it  
114 specifically innervates the sensory peg. Surprisingly, adult female *Aclr76b*<sup>-/-</sup> mosquitoes  
115 display significantly increased antennal responses to several amines, whereas  
116 peripheral responses to acid stimuli are unaffected. Behaviorally, *Aclr76b* mutant  
117 females display severe mating deficits and, interestingly, have acutely lost the ability to  
118 blood feed successfully. These studies demonstrate that *Aclr76b* acts in both olfactory  
119 and gustatory systems of *An. coluzzii* where it impacts the reproductive fitness and  
120 ultimately the vectorial capacity of this globally important mosquito.

121

## 122 **Materials and Methods**

### 123 **Mosquito rearing**

124 *An. coluzzii* (SUA 2La/2La), previously known as *Anopheles gambiae* sensu  
125 stricto “M-form” (1), originating from Suakoko, Liberia, were reared using previously  
126 described protocols. Briefly, all mosquito lines were reared at 27°C, 75% humidity under  
127 a 12h light/12h dark photoperiod and supplied with 10% sucrose water in the Vanderbilt  
128 University Insectary (33, 34). For stock propagation, 5- to 7-day-old mated females were  
129 blood fed for 30-45 min using a membrane feeding system (Hemotek, Lancaster, UK)  
130 filled with defibrinated sheep blood purchased from Hemostat Laboratories (Dixon, CA).  
131 Mosquito larvae were reared in distilled water at 27°C under the standard 12h light/12h  
132 dark cycle, with approximately 300 larvae per rearing pan in 1L H<sub>2</sub>O. The larval food  
133 was made from 0.12g/mL Kaytee Koi’s Choice premium fish food (Chilton, WI) plus  
134 0.06g/mL yeast in distilled water and subsequently incubated at 4°C overnight for  
135 fermentation. For first and second instar larvae, 0.08mL larval food was added into the  
136 water every 24h. The *An. coluzzii* effector line (QUAS-mCD8:GFP) was a generous gift  
137 from the lab of Dr. C. Potter at The Johns Hopkins University School of Medicine.

### 138 **Mosquito mutagenesis**

139 CRISPR/Cas9 gene editing in *An. coluzzii* was carried out as previously  
140 described (35). The CRISPR gene-targeting vector was a kind gift from the lab of Dr.  
141 Crisanti at Imperial College London (36). The single guide RNA (sgRNA) sequence was  
142 designed by CHOPCHOP (37) to target the first exon of *Aclr76b* gene (ACOM032257).  
143 The complimentary oligos (lr76b\_gRNA\_F/lr76b\_gRNA\_R; **Table S1**) were artificially  
144 synthesized (Integrated DNA Technologies, Coralville, IA) and subcloned into the  
145 CRISPR vector by Golden Gate cloning (New England Biolabs, Ipswich, MA). The  
146 homologous templates were constructed based on a pHD-DsRed vector (a gift from

147 Kate O'Connor-Giles; Addgene plasmid #51434; <http://n2t.net/addgene:51434>;  
148 RRID:Addgene 51434) where the 2-kb homologous arms extending either direction from  
149 the double-stranded break (DSB) site were PCR amplified with the customized  
150 oligonucleotide primers: Ir76b\_AarI\_F/Ir76b\_AarI\_R; Ir76b\_SapI\_F/Ir76b\_SapI\_R  
151 (**Table S1**) and sequentially inserted into the AarI/SapI restriction sites on the vector.

152 The microinjection protocol follows a previous study (16, 38). In brief, newly laid  
153 (approximately 1h-old) embryos of the wild-type *An. coluzzii* were immediately collected  
154 and aligned on a filter paper moistened with 25mM sodium chloride solution. All the  
155 embryos were fixed on a coverslip with double-sided tape, and a drop of halocarbon oil  
156 27 was applied to cover the embryos. The coverslip was further fixed on a slide under a  
157 Zeiss Axiovert 35 microscope with a 40x objective. The microinjection was performed  
158 using Eppendorf FemtoJet 5247 (Eppendorf, Hamburg, Germany) and quartz needles  
159 (Sutter Instrument, Novato, CA). The gene-targeting vector and the homologous  
160 template were co-injected at 300ng/ $\mu$ L each. Injected embryos were subsequently  
161 placed in deionized water with artificial sea salt (0.3g/L) and thereafter reared under  
162 normal VU insectary conditions.

163 First generation (G0) of injected adults were separated based on gender and  
164 crossed to 5x wild-type gender counterparts. Their offspring (F1) were screened for  
165 DsRed-derived red eye fluorescence. Red-eyed F1 males were individually crossed to  
166 5x wild-type females to establish a stable mutant line. DNA extraction was performed  
167 using DNeasy Blood & Tissue kits following the manufacturer's instruction (Qiagen,  
168 Hilden, Germany) and the genomic DNA was used as templates for PCR analyses of all  
169 individuals (after mating) to validate the fluorescence marker insertion using primers



170 that cover double-stranded break site (Ir76b\_F/Ir76b\_R; **Table S1**). Salient PCR  
171 products were sequenced to confirm the accuracy of the genomic insertion. The  
172 heterozygous mutant lines were thereafter back-crossed to the wild-type *An. coluzzii* for  
173 at least five generations before putative homozygous individuals were manually  
174 screened for DsRed-derived red eye fluorescence intensity. Putative homozygotic  
175 mutant individuals were mated to each other before being sacrificed for genomic DNA  
176 extraction and PCR analyses (as above) to confirm their homozygosity.

177 To generate the *Aclr76b-QF2* driver line for Q system, *T2A-QF2-3xP3-DsRed*  
178 element was inserted into the *Ir76b* coding region through CRISPR-mediated  
179 homologous recombination. DSB was induced using the CRISPR gene-targeting vector  
180 described above. The homologous template that contains *T2A-QF2-3xP3-DsRed*  
181 element, which was amplified from the ppk301-T2A-QF2 HDR plasmid (Matthews et al.,  
182 2019; A gift from Leslie Vosshall; Addgene plasmid# 130667;  
183 <http://n2t.net/addgene:130667>; RRID:Addgene\_130667), flanked by ~2kb homologous  
184 arms, was constructed using NEBuilder HiFi DNA Assembly kit (NEB, Ipswich, MA)  
185 (Ir76b\_LArm\_F/Ir76b\_LArm\_R; Ir76b\_RArm\_F/Ir76b\_RArm\_R;  
186 Ir76b\_T2A\_F/Ir76b\_T2A\_R; **Table S1**). From the left homologous arm immediately  
187 preceding the *T2A*, 2bp was removed to keep the *T2A* sequence in-frame. Red-eyed F1  
188 mosquitoes were backcrossed for three generations and then crossed to the effector  
189 line to acquire progeny for Ir76b localization studies.

## 190 **Immunohistochemistry**

191 Antibody staining was performed as previously described (10, 16). Antennae,  
192 labella, and maxillary palps were dissected into 4% formaldehyde in PBST and fixed on

193 ice for 30min. Samples were washed 3x in PBST for 10min each and then embedded in  
194 TFM (Tissue Freezing Medium; General Data Company Inc., Cincinnati, OH).  
195 Cryosections were obtained at -20°C using a CM1900 cryostat (Leica Microsystems,  
196 Bannockburn, IL). Samples were sectioned at ~10µm and transferred onto Superfrost  
197 plus slides (VWR Scientific, Radnor, PA). Slides were air-dried at room temperature  
198 (RT) for 30min and fixed in 4% formaldehyde in PBST for 10min, followed by 3x rinsing  
199 in PBST for 10min each. Thereafter, 5% normal goat serum (Sigma-Aldrich, St. Louis,  
200 MO) in PBST was applied and the slides were blocked in the dark at RT for 1h in  
201 HybriWell sealing chambers (Grace Bio-Labs, Bend, OR). Primary antibody Rabbit α-  
202 Orco was diluted 1:500 in 5% normal goat serum in PBST and applied on the slides and  
203 incubated overnight at 4°C.

204       After primary antibody staining, slides were washed 3x in PBST for 10min each  
205 and stained with secondary antibody Goat α-Rabbit-Cy3 (Jackson ImmunoResearch,  
206 West Grove, PA) 1:500 in 5% normal goat serum PBST for 2h at RT and then rinsed 3x.  
207 Nuclei were stained with 300nM DAPI (Invitrogen, Carlsbad, CA) at RT for 10min.  
208 Slides were briefly washed and mounted in Vectashield medium (Vector Laboratories,  
209 Burlingame, CA). Whole-mount samples were dissected into 4% formaldehyde in PBST  
210 and fixed on ice for 30min. After 3x washing in PBST for 10min each, the samples were  
211 transferred onto slides and mounted in Vectashield medium (Vector Laboratories,  
212 Burlingame, CA). Confocal microscopy images at 1024x1024 pixel resolution were  
213 collected from under an Olympus FV-1000 equipped with a 100x oil objective at the  
214 Vanderbilt University Cell Imaging Shared Resource Core. Laser wavelengths of  
215 405nm, 488nm, and 543nm were used to detect DAPI, GFP, and Cy3, respectively.

## 216 **Transcuticular electrophysiology**

217 Electroantennogram (EAG), electropalpogram (EPG), and electrolabellogram  
218 (ELG) recordings were conducted following a previous study, with modifications (7, 34).  
219 Female mosquitoes (4-10 days after eclosion) with legs and wings removed were fixed  
220 on glass slides using double-sided tape. The last segment of antenna with the tip  
221 partially cut was subsequently connected to a recording glass electrode filled with  
222 Ringer solution (96mM NaCl, 2mM KCl, 1mM MgCl<sub>2</sub>, 1mM CaCl<sub>2</sub>, 5mM HEPES, pH =  
223 7.5), to which a tungsten wire was in contact to complete a circuit with another glass  
224 reference electrode similarly connected into the compound eye of the female. The  
225 antennal preparation was continuously exposed to humidified, charcoal-filtered air flow  
226 (1.84 L/min) transferred through a borosilicate glass tube (inner diameter = 0.8cm) using  
227 a stimulus controller (Syntech, Hilversum, The Netherlands), and the open end of the  
228 glass tube was located 1 cm from the antennal preparation. All chemicals were diluted  
229 to 10<sup>-1</sup> (v/v) working solutions in paraffin oil except for lactic acid, acetic acid, ammonia,  
230 and dimethylamine which were diluted in ddH<sub>2</sub>O. 10- $\mu$ l aliquots of test or control stimuli  
231 were transferred onto a piece of filter paper (3 x 50 mm) which was then placed inside  
232 the Pasteur pipette. Odor was delivered to the antennal preparation for 500ms through  
233 a hole placed on the side of the glass tube located 10cm from the open end of the tube  
234 (1.08 L/min), and the stimulus odor was mixed with continuous air flow through the hole.  
235 A charcoal-filtered air flow (0.76 L/min) was delivered from another valve through a  
236 blank pipette into the glass tube at the same distance from the preparation in order to  
237 minimize changes in flow rate during odor stimulation. The resulting signals were  
238 amplified 10x and imported into a PC via an intelligent data acquisition controller (IDAC,

239 Syntech, Hilversum, The Netherlands) interface box, and then recordings were  
240 analyzed using EAG software (EAG Version 2.7, Syntech, Hilversum, The Netherlands).  
241 Response amplitudes were normalized by dividing the response amplitude of odorant  
242 stimuli by the response amplitude of control (solvent alone) responses.

### 243 **Single sensillum recording**

244 Single sensillum recordings (SSR) were carried out as previously described (40,  
245 41) with minor modifications. Female adult mosquitoes (4-10 days after eclosion) were  
246 mounted on a microscope slide (76 × 26 mm). Using double-sided tape, the antennae  
247 were fixed to a cover slip resting on a small bead of dental wax to facilitate  
248 manipulation, and the cover slip was placed at approximately 30 degrees to the  
249 mosquito head. Once mounted, the specimen was placed under an Olympus BX51WI  
250 microscope and the antennae viewed at high magnification (1000×). Recordings were  
251 carried out using two tungsten microelectrodes freshly sharpened in 10% KNO<sub>2</sub> at 10V.  
252 The grounded reference electrode was inserted into the compound eye of the mosquito  
253 using a WPI micromanipulator, and the recording electrode was connected to the  
254 preamplifier (Syntech universal AC/DC 10×, Syntech, Hilversum, The Netherlands) and  
255 inserted into the shaft of the olfactory sensillum to complete the electrical circuit to  
256 extracellularly record OSN potentials (42). Controlled manipulation of the recording  
257 electrode was performed using a Burleigh micromanipulator (Model PCS6000). The  
258 preamplifier was connected to an analog-to-digital signal converter (IDAC-4, Syntech,  
259 Hilversum, The Netherlands), which in turn was connected to a computer for signal  
260 recording and visualization.

261 All chemicals were diluted to  $10^{-2}$  (v/v) working solutions in paraffin oil except for  
262 lactic acid, acetic acid, and dimethylamine which were diluted in ddH<sub>2</sub>O. For each  
263 chemical, a 10- $\mu$ l aliquot was applied onto a filter paper (3 × 50mm) which was then  
264 inserted into a Pasteur pipette to create the stimulus cartridge. A sample containing the  
265 solvent (paraffin oil or water) alone served as the control. The airflow was maintained at  
266 a constant 20mL/s throughout the experiment. Purified and humidified air was delivered  
267 to the preparation through a glass tube (10-mm inner diameter) perforated by a small  
268 hole 10cm away from the end into which the tip of the Pasteur pipette could be inserted.  
269 The stimulus was delivered to the sensilla by inserting the tip of the stimulus cartridge  
270 into this hole and diverting a portion of the air stream (0.5L/min) to flow through the  
271 stimulus cartridge for 500ms using a stimulus controller (Syntech, Hilversum, The  
272 Netherlands). The distance between the end of the glass tube and the antennae was  
273  $\leq$ 1cm. Signals were recorded for 10s, starting 1s before stimulation, and the action  
274 potential spikes were counted off-line over a 500-ms period before and after stimulation.  
275 Spike rates observed during the 500-ms stimulation were subtracted from the  
276 spontaneous (background) spike activity observed in the preceding 500ms, and counts  
277 were recorded in units of spikes/s. Post-stimulus “OFF” responses were calculated by  
278 subtracting the pre-stimulus background activities from the spike counts in the 1s  
279 immediately following the stimulus application. Responses of odorants were always  
280 normalized by subtracting the solvent responses.

## 281 **Mating bioassay**

282 Newly emerged wild-type females and males were separated from day 1 to  
283 ensure no mating occurred. 15 females and 10 males were then placed in a rearing

284 bucket and allowed to mate freely for 5 days. All surviving females were then collected  
285 and their spermathecae were dissected under a compound microscope. The  
286 spermathecae were then placed in the buffer (145mM NaCl, 4mM KCl, 1mM MgCl<sub>2</sub>,  
287 1.3mM CaCl<sub>2</sub>, 5mM D-glucose, 10mM HEPES) (43) with 300nM DAPI, and a cover slip  
288 was used to gently press and break the spermathecae to release the sperm. As in  
289 previous studies (15), the spermathecae were examined, under the 1000× compound  
290 microscope, to assess the insemination status. The insemination rate was calculated by  
291 dividing the number of inseminated females by the total number of females in each  
292 bucket.

### 293 **Blood feeding bioassay**

294 Feeding bioassays were carried out for the 6- to 8-day-old wild-type and *Aclr76b*  
295 females between ZT11 and ZT12 during which *An. coluzzii* was shown to be  
296 behaviorally active. Mosquitoes were starved, with only water access, for 24h prior to  
297 the bioassay. Defibrinated sheep blood was stored at 4°C and used within 2 weeks of  
298 purchasing (Hemostat Laboratories, Dixon, CA). Human foot odorants were provided as  
299 cloth strips cut from socks that had been continually worn for 5 days by a 30-year-old  
300 male volunteer and thereafter incubated overnight at 37°C in a sealed Ziploc plastic bag  
301 (SC Johnson, Racine, WI). For each replicate, 25-30 female mosquitoes were released  
302 into a 32-oz container, the top of which was covered with a net through which the  
303 mosquito proboscises are able to penetrate to feed but not to escape. A membrane  
304 feeder (Hemotek, Lancaster, UK) that heated the blood meal to 37°C was then placed  
305 on the net. A mini camera (GoPro, San Mateo, CA) was set at the bottom of the  
306 container to record the landing activity of mosquitoes. A human volunteer smoothly

307 exhaled into the container for 5 s to activate the mosquitoes with CO<sub>2</sub> for blood feeding.  
308 The mosquitoes were allowed to feed freely for 25min and then were immediately  
309 anesthetized at -20°C in order to assess the number with blood-engorged abdomens,  
310 indicative of successful blood feeding. The assay containers and videos were also  
311 analyzed post hoc by volunteers blinded to the experimental genotypes, who manually  
312 counted both blood-engorged mosquitoes and the number of landings onto the feeder  
313 during the assay. The total landing count was divided by the total mosquito number in  
314 each assay to calculate the landing number per mosquito.

### 315 **Capillary feeder (CAFE) bioassay**

316 The CAFE bioassay was conducted following a previous study, with minor  
317 modifications (15, 44). Each trial started at ZT12 and ended at ZT18 for 6h. Four 4- to 8-  
318 day-old mosquitoes were provided with water but otherwise fasted for 22h before being  
319 anesthetized on ice briefly and placed into a *Drosophila* vial (24.5 × 95mm; Fisher  
320 Scientific, Waltham, MA). A borosilicate glass capillary (1B100F-3; World Precision  
321 Instruments, Sarasota, FL) was filled with 10% sucrose water and embedded into a  
322 cotton plug. The vial opening was then blocked with the cotton plug and the capillary  
323 was placed slightly protruding from the plug into the vial for mosquitoes to feed on. The  
324 sugar level in the capillary was compared before and after each trial to generate the  
325 initial sugar consumption value. At least four control vials with no mosquitoes inside  
326 were used to assess the evaporation at the same time. The final sugar consumption  
327 was calculated by subtracting the evaporation from the initial sugar consumption value.

328

## 329 **Results**

### 330 ***Aclr76b* expression in antennal grooved pegs**

331 In order to identify the types of antennal sensilla in which *Aclr76b* activity is  
332 salient, the spatial expression pattern of *Aclr76b* was established using the binary  
333 expression Q system (16, 45), which provides more sensitivity than fluorescence *in-situ*  
334 hybridization (FISH)-based methods previously used (11). This system requires genetic  
335 crosses between a QUAS-GFP effector line and a *Aclr76b promoter-QF2* (*Aclr76b*-  
336 *QF2*) driver line, resulting in GFP fluorescence in *Aclr76b*-expressing cells. While  
337 previous Anopheline driver lines were developed by integrating *promoter-QF2*  
338 constructs into pre-defined or random genomic sites (16, 45), those promoters were  
339 presumptive as they were derived from selected regions of 5' upstream sequences  
340 without precise elucidation of the required regulatory sequences. As such, those  
341 promoters are potentially error-prone and artifactual, leading to localizations that are  
342 compromised by over-/under-expression from fragmented or otherwise partial regulatory  
343 information. To overcome this limitation, we incorporated a newly developed approach  
344 using CRISPR-mediated homologous recombination to insert a *T2A-QF2-3xP3-DsRed*  
345 element into the *Aclr76b* locus at the first exon (**Figure 1A**) (39), and the knock-in was  
346 subsequently confirmed by means of genomic PCR (**Figure 1B**) and sequencing. The  
347 T2A peptide induces ribosomal skipping which facilitates the unbiased expression of  
348 *QF2* driven by endogenous, fully intact *Aclr76b* regulatory sequences (46). For  
349 localization studies, F1 progeny derived from crosses between appropriate parental  
350 driver and effector lines would therefore express the *QF2* transcriptional factor that



351 specifically binds to the QUAS activation sequence to drive expressions of the visual  
352 marker *GFP* in all *An. coluzzii* cells that normally express *Aclr76b*.

353 In these studies, extensive *GFP* labelling was observed in antennal grooved  
354 pegs (basiconic sensilla) of 4- to 6-day-old adult female *An. coluzzii*, which would be  
355 expected to be actively seeking blood meals. Across multiple replicates that were  
356 examined on the 2<sup>nd</sup>-13<sup>th</sup> antennal flagellomeres, 100% of grooved pegs, easily  
357 identified through their distinctive morphology, contained *Aclr76b*-expressing neurons  
358 displaying *GFP*-derived fluorescence in their dendrites (**Figure 1C&D**). In contrast, *GFP*  
359 signal was never observed in any trichoid sensilla screened across more than 20  
360 individual antennal preparations. Recent studies have uncovered non-canonical co-  
361 expression of IRs and ORs in a subset of chemosensory neurons of *Drosophila* and *Ae.*  
362 *aegypti* (47, 48). In that light, we investigated whether IR/OR co-expression also occurs  
363 in *An. coluzzii* by immunolocalization using Orco-specific antibodies together with *Ir76b*-  
364 *QF* progeny. Our data suggest that while the majority (>95%) of *Ir76b-GFP*-positive  
365 cells are not labelled by Orco antibodies (**Figure 1E**), at least a small subset do indeed  
366 co-express *Aclr76b* and *Orco* (**Figure 1F**). Inasmuch as our examination of antennal  
367 trichoid sensilla as well as previous studies of *An. coluzzii* grooved pegs indicate they  
368 are devoid of Orco protein (10), the co-expression of *Aclr76b* and *Orco* seen here likely  
369 reflect either cryptic coeloconic or an as-yet unidentified population of sensilla.

370 In addition to the antennae of *An. coluzzii* females, *Aclr76b* localization analyses  
371 revealed that while the maxillary palps are devoid of *Aclr76b*-expressing cells, they are  
372 highly enriched in the labella (**Figure 1G**) and also present on the pre-, meso-, and  
373 meta-tarsi (**Figure S1**). On the *An. coluzzii* female labellum, *Aclr76b* is expressed in two

374 populations of neurons with distinctive dendrites: the relatively long dendrites that  
375 innervate gustatory T1 sensilla and the short dendrites that are associated with olfactory  
376 T2 sensilla (**Figure 1G**) (7, 49). As was the case for the antennae, *Aclr76b* and *Orco*  
377 are co-expressed in a subset of cells present on the labella of *An. coluzzii* females  
378 (**Figure 1H**).

### 379 **Generation of *Aclr76b* null mutants**

380 The *Aclr76b* null mutant line was generated using the CRISPR/Cas9 system  
381 together with the double-strand break (DSB)-specific homology template in order to  
382 knock-in a *3xP3-DsRed* visible marker construct at the *Aclr76b* DSB site. The sgRNA  
383 was chosen to target the first exon of *Aclr76b* to produce an early stop codon that leads  
384 to a malfunctional protein (**Figure 2A**). In total, 376 pre-blastoderm embryos were  
385 microinjected with the homologous template and the CRISPR targeting vector, in which  
386 Cas9 expression is regulated by the *vasa2* promoter to specifically induce germ cell  
387 mutagenesis. Of the 17 larvae (4.5%) that survived the injection, 2 female and 2 male  
388 adults were able to successfully eclose and were designated as G0. These adults were  
389 then collectively crossed with the wild-type population, and the progeny (F1) were  
390 screened for the presence of red fluorescence in the eye and ventral nerve cord that  
391 would be expected if they contain a *3xP3-DsRed* insert. At least one of the G0-injected  
392 adults produced red-eyed F1 offspring, which indicates a high mutagenesis efficiency  
393 ( $\geq 25\%$ ). Red-eyed F1 males were individually back-crossed with wild-type females after  
394 which their *Aclr76b* mutant genotype was confirmed by genomic PCR (**Figure 2B**) and  
395 DNA sequencing. Homozygous mutants were generated by crossing heterozygotes with  
396 progeny selected based on their high intensities of red fluorescence, and thereafter

397 genomic PCR (**Figure 2B**) and DNA sequencing was carried out to confirm phenotypic  
398 assessments.

### 399 **Electroantennogram revealed increased responses to amines in *Aclr76b* mutants**

400 In order to initially investigate the function of *Aclr76b* in adult antennal olfactory  
401 responses, transcuticular EAG studies were carried out to broadly compare responses  
402 between *Aclr76b*<sup>-/-</sup> and wild-type females against a panel of acids and amines.  
403 Surprisingly, in contrast to response deficits typically seen in other olfactory co-receptor  
404 mutants studies (21, 22, 30), the EAG responses to several amines, including pyridine,  
405 pyrrolidine, 3-methylpiperidine, 3-pyrroline, and 1-butylamine, were significantly higher  
406 in *Aclr76b*<sup>-/-</sup> females than wild type (**Figure 2C&D**). In addition, EAG studies failed to  
407 reveal a significant impact on responses of *Aclr76b*<sup>-/-</sup> females to a panel of acid stimuli  
408 (**Figure 2D**).

### 409 **Elevated single sensillum responses in *Aclr76b*<sup>-/-</sup> grooved pegs**

410 The localization of antennal *Aclr76b* suggests that the increased EAG responses  
411 to amines (**Figure 2C&D**) are most likely due to elevated neuronal responses in  
412 populations of grooved pegs. To test this hypothesis, SSR studies were carried out  
413 across a randomized sampling of 14 antennal grooved pegs to characterize and  
414 compare response profiles of *Aclr76b*<sup>-/-</sup> and wild-type females. The data reveal a range  
415 of wild-type responses to several amines that includes both excitation and inhibition  
416 (**Figure 3A&B**). Interestingly, while *Aclr76b*<sup>-/-</sup> mutants displayed wild-type levels of  
417 spontaneous (background) neuronal activity (**Figure 3C**) as well as responses to  
418 pyridine, 2-methyl-2-thiazoline, and phenylethylamine, we observed significantly

419 elevated excitation elicited by pyrrolidine, 3-pyrroline, 3-methylpiperidine, and 1-  
420 butylamine compared with the wild-type responses (**Figure 3A, 3B & Figure S2**).  
421 Furthermore, post-stimulus “OFF” responses of grooved pegs were also analyzed,  
422 revealing significantly higher levels of neuronal spiking in the aftermath of 3-  
423 methylpiperidine stimulation in the mutants than in their wild-type counterparts (**Figure**  
424 **3D**). No significant differences were detected in the olfactory responses to amines from  
425 antennal trichoid sensilla when comparing *Aclr76b*<sup>-/-</sup> mutants and similarly aged wild-  
426 type female *An. coluzzii* (**Figure 3E**).

427         Considering that the technical challenges of visualization within the unique  
428 ultrastructure of peg-in-pit antennal coeloconic sensilla might account for the absence of  
429 GFP signals in *Aclr76b-GFP* whole-mounts, randomized SSR responses to acids and  
430 amines across the 2<sup>nd</sup>-8<sup>th</sup> flagellomeres were also carried out to explore potential  
431 *Aclr76b* function (**Figure 4A**). While wild-type and *Aclr76b*<sup>-/-</sup> female coeloconic sensilla  
432 displayed similar levels of spontaneous (background) neuronal activity (**Figure 4B**),  
433 *Aclr76b*<sup>-/-</sup> females became indifferent to hexanoic acid, phenylacetic acid, pyridine,  
434 pyrrolidine, 2-methyl-2-thiazoline, and 1,4-diaminobutane in contrast to robust wild-type  
435 responses (**Figure 4C**). Similar *Aclr76b*<sup>-/-</sup> decreases in “OFF” responses were also  
436 observed after stimulation with phenylacetic acid and pyridine (**Figure 4D**). While  
437 *Aclr76b*<sup>-/-</sup> females exhibited modest, albeit non-significant increases in acetic acid  
438 responses compared with wild types (**Figure 4C**), these mutants displayed significantly  
439 higher post-stimulus “OFF” responses to acetic acid (**Figure 4D**).

440 **Peripheral electrophysiology across accessory chemosensory appendages**

441 To further confirm the specificity of the antennal phenotype, we carried out SSR  
442 studies on female *An. coluzzii* maxillary palp capitata pegs (cp), which are the sole  
443 sensillar class found on that appendage (5). While previous RNAseq-based  
444 transcriptome profiles of the *An. coluzzii* female maxillary palps uncovered *Aclr76b*  
445 transcripts (50, 51), no GFP-labelled cells were identified on female *lr76b-GFP* progeny,  
446 which likely reflects the sensitivity differences between these two approaches. In that  
447 light, it was not surprising that the well-characterized GR- and OR-mediated responses  
448 of the cpA neuron to CO<sub>2</sub> and the cpB/C neurons to 1-octen-3-ol and 2,4,5-  
449 trimethylthiazole, respectively (5), were not affected in *Aclr76b*<sup>-/-</sup> mutants (**Figure S3A**).  
450 Furthermore, in contrast to the antennae, elevated palpal responses were not observed  
451 when comparing wild-type and mutant responses using a transcuticular EPG recording  
452 of the maxillary palp (**Figure S3B**).

453 Lastly, in light of extensive *Aclr76b* expression across the labellum (**Figure 1G**),  
454 we also employed the ELG, an EAG/EPG-like transcuticular sampling of peripheral  
455 neuronal activity on the labellum (7), to assess responses to a panel of amines to  
456 determine whether *Aclr76b* might play a role in olfactory responses on that appendage.  
457 Surprisingly, in light of the robust *Aclr76b* labellum expressio these studies revealed no  
458 significant differences between the amine response profiles of the *An. coluzzii* wild-type  
459 and *Aclr76b*<sup>-/-</sup> female labellum (**Figure S3C**).

#### 460 ***Aclr76b* expression in a distinct antennal organ in larvae**

461 *Aclr76b* expression was also examined across the larval antennae of *An. coluzzii*  
462 which is the principal sensory appendage of this aquatic pre-adult life stage (41, 52). In  
463 addition to robust labelling of larval antennal neuronal cell bodies, which are clustered

464 within the antennal shaft (**Figure S4A**), the *Aclr76b* promoter appears to drive GFP-  
465 labeling of dendrites that specifically innervate the sensory peg organ (**Figure S4A**).  
466 The larval sensory peg is a distinctive uniporous apical appendage on the antennae that  
467 has been hypothesized to play gustatory roles (**Figure S4B**) (52, 53). *Aclr76b*  
468 localization to the larval sensory peg dendrites is distinct from the dendritic localization  
469 of *An. coluzzii* ORs to the larval sensory cone where they are associated with olfactory  
470 signals (41, 52).

471         Despite their proximity at the apical tip of the larval antennae, the activity of the  
472 sensory peg is distinct from that of the OR-associated sensory cone which acts as the  
473 primary larval olfactory organ in *Anopheles* (41, 52). While technical limitations have  
474 thus far precluded direct recording of neuronal activities from the uniporous larval peg,  
475 we have nevertheless recently carried out a comprehensive electrophysiological  
476 analysis of peripheral larval sensory cone neuron responses to a wide range of volatile  
477 stimuli (41). These SSR-based methods were used to examine the functionality of wild-  
478 type and *Aclr76b*<sup>-/-</sup> larval sensory cones to further narrow its role to the sensory peg. As  
479 expected, based on the absence of *Aclr76b*-associated sensory cone dendrites, these  
480 recordings failed to reveal any significant differences between wild type and *Aclr76b*<sup>-/-</sup>  
481 mutants insofar as background neuronal activity (**Figure S4C**) or responses to a panel  
482 of amines (**Figure S4D**).

### 483 **Mating and blood-feeding deficits in *Aclr76b* mutants**

484         In addition to their impact on the peripheral electrophysiology in adult females,  
485 *Aclr76b*<sup>-/-</sup> mutants display a range of interesting behavioral and reproduction-related  
486 deficits and, as a result, cannot self-propagate under standard laboratory rearing

487 protocols. To investigate this phenotype, we took advantage of a previously developed  
488 insemination-based mating bioassay (15) to reveal that self-mated *Aclr76b*<sup>-/-</sup> mutants  
489 display significantly impaired insemination rates when compared with their wild-type  
490 counterparts (**Figure 5A**). To investigate this phenotype further, mating studies were  
491 conducted in which *Aclr76b*<sup>-/-</sup> females were replaced with their wild-type counterparts.  
492 Here, wild-type females successfully mated with *Aclr76b*<sup>-/-</sup> males to fully rescue the  
493 mutant mating/insemination deficits. In addition, studies that paired wild-type males with  
494 *Aclr76b*<sup>-/-</sup> females had severe mating deficits (**Figure 5A**), indicating that *Aclr76b* plays  
495 a female-specific role in *An. coluzzii* mating.

496 We next asked what other aspects of the female reproductive pathway might  
497 underlie the mating deficits and sterility of the *Aclr76b*<sup>-/-</sup> mutants. To address this  
498 question, we utilized a simple digital video-based blood feeding bioassay (54) to  
499 examine whether female *Aclr76b*<sup>-/-</sup> mutants were able to successfully initiate and  
500 complete blood feeding. Here, 25-30 female mosquitoes were exposed to membrane  
501 feeders containing warmed blood meals supplemented with human foot odors released  
502 from worn socks and CO<sub>2</sub> for 25 min. Under these conditions, approximately 30% of  
503 wild-type females successfully completed blood feeding as assessed by the presence of  
504 extended and blood-filled abdomens. We also examined alighting (landing) on the  
505 membrane feeder as a distinct component of blood-feeding behaviors by recording and  
506 quantifying those events at the surface of the blood feeder during feeding bioassays.  
507 These studies indicated that *Aclr76b*<sup>-/-</sup> females maintain wild-type levels of landings  
508 (**Figure 5B**), which suggests their blood-feeding deficits are not due to the reduction of  
509 host-seeking behaviors. However, under identical conditions, while wild-type levels of

510 alighting and probing activity were observed, none (0%) of the *Aclr76b*<sup>-/-</sup> females that  
511 were assayed blood fed successfully (**Figure 5C**).

512 In light of the profound mating deficits exhibited by *Aclr76b*<sup>-/-</sup> females that might  
513 conceivably underlie or indirectly impact blood-feeding efficiency, we also examined the  
514 ability of virgin (unmated) wild-type females to blood feed. Here, and consistent with  
515 previous studies (55–57), wild-type virgins did not exhibit a significant alteration in  
516 blood-feeding propensity when compared with their wild-type counterparts that were first  
517 allowed to mate (**Figure 5C**).

518 As is the case for other mosquitoes, *Anopheles* blood feeding is a highly  
519 specialized behavior that is quite distinct from nectar (sugar) feeding (58). Subsequent  
520 to host seeking and landing, another critical aspect of mosquito blood feeding is the  
521 process of blood ingestion (uptake), which occurs through the stylet (58). The stylet is a  
522 highly specialized component of the labellum that pierces the skin of blood-meal hosts  
523 to make direct contact with blood and is used solely for blood feeding. Recent studies in  
524 *Ae. aegypti* have illustrated the roles of *Ir7a* and *Ir7f*, which are expressed in stylet  
525 gustatory neurons where they are specifically responsible for mediating the direct  
526 chemosensory (taste) responses to blood-meal components (59). In light of the  
527 association of the *DmIr76b* ortholog in amino acid responses in *Drosophila* (26), we  
528 hypothesized that *Aclr76b* also acts as a gustatory IR co-receptor and, in that context,  
529 would be expressed on the stylet of *An. coluzzii*. Indeed, crosses between *Aclr76b*-QF2  
530 driver and *QUAS-GFP* effector lines revealed robust expression of *Aclr76b* in the stylet  
531 (**Figure 5D**). In order to examine the blood-meal specificity of this feeding deficit  
532 phenotype, we used the well-established CAFE capillary feeding assay (15, 44) to



533 examine sugar feeding. These studies confirmed *Aclr76b*<sup>-/-</sup> females can maintain wild-  
534 type levels of sugar feeding via their proboscis (**Figure 5E**) that are consistent with a  
535 highly specialized blood-feeding functionality of *Aclr76b* on the stylet of *An. coluzzii*.

536

## 537 **Discussion**

538         Acting together or independently, Anopheline IRs, GRs and ORs are critical  
539 molecular components of the signal transduction processes that initiate diverse  
540 chemosensory processes underlying various elements of the mosquito lifecycle. While  
541 many of the particulars of these relationships remain opaque, it is clear the collective  
542 functionality of these elements has direct implications on the biology and the vectorial  
543 capacity of these mosquitoes. Recent advances in gene-editing approaches have led to  
544 an increasingly refined appreciation of the roles of insect IR and OR co-receptors in  
545 mediating both gustatory and olfactory signal transduction, with broad implications on  
546 mosquito behavior and physiology (21, 22, 30). Here, we have used state-of-the-art  
547 gene-editing/labelling approaches to characterize the expression and function of the  
548 ionotropic receptor co-receptor *Aclr76b* in the IR-dependent chemical ecology of the  
549 malaria vector mosquito *An. coluzzii*.

550         While IRs, GRs and ORs have traditionally been presumed to populate distinct  
551 classes of chemosensory neurons, recent studies demonstrated multiple types of  
552 receptors can be co-expressed in the same neuron (47, 48). Regardless of their specific  
553 cellular context, and considering the tight clustering of neurons within insect sensilla,  
554 these diverse classes of ionotropic receptors may have direct as well as

555 indirect/modulatory roles in mediating the activation or inhibition of chemosensory  
556 neurons. For example, the *Ir25a* co-receptor is co-expressed with *Gr3* and *Orco* in *Ae.*  
557 *aegypti* and *Drosophila*, respectively (47, 48). In *Aedes*, knocking out *Gr3* on the CO<sub>2</sub>-  
558 sensitive cpA maxillary palp neuron removes CO<sub>2</sub> sensitivity but importantly does not  
559 block responses to amines mediated by *Aelr25a* in the same neurons (47). In  
560 *Drosophila*, while *Orco* null mutations completely abolished OSN activity, *Dmlr25a*  
561 mutations resulted in mostly non-altered or only partially reduced/increased responses  
562 suggesting that *Dmlr25a* plays a regulatory role when coupled with ORs instead of  
563 acting as a canonical co-receptor (48). We initially focused on the role of *Aclr76b* in  
564 adult *An. coluzzii* females that are actively host seeking for a blood meal. In those  
565 insects, robust *Ir76b* expression occurred in the antennal grooved pegs (**Figure 1**),  
566 which are considered homologous to *Drosophila* coeloconic sensilla (60), as well as in  
567 T1 and T2 sensillum of the labellum (**Figure 1**) and across the tarsi (**Figure S1**). We  
568 also examined its expression in the larval chemosensory system which is housed on the  
569 antennae. Here, in contrast to the dendritic localization of *An. coluzzii* larval ORs,  
570 *Aclr76b* specifically labeled dendrites innervating the sensory peg, which is an apical  
571 uniporous structure associated with larval gustatory responses.

572 The new-found availability of CRISPR/Cas9-mediated gene targeting in *An.*  
573 *coluzzii* allowed us to examine loss-of-function phenotypes resulting from *Aclr76b* null  
574 mutations. These are the first reports of *Ir76b* mutagenesis in mosquitoes. In addition to  
575 defective coeloconic SSR responses to amines, consistent with that observed in  
576 *Drosophila* (24), CRISPR-generated *Aclr76b* null mutants exhibited significantly  
577 enhanced antennal responses to amines in both EAG and grooved peg SSR studies in

578 contrast to *Ae. aegypti* *Aelr8a* mutants that abolish olfactory sensitivity to acids (30).  
579 These data are similar to previous studies that identified enhanced gustatory responses  
580 to sugars in *Drosophila* *Ir76b* mutants (61) and suggest *Ir76b*'s modulatory function is  
581 both context dependent and evolutionarily conserved. In *An. coluzzii*, this phenotype is  
582 restricted to the large population of non-*Orco*-expressing grooved pegs, where dramatic  
583 increases in amine responses seen in *Aclr76b* null mutants suggest that *Aclr76b* is  
584 responsible for inhibition of neuronal activity in wild-type neurons and, moreover, the  
585 presence of another IR co-receptor that is primarily responsible for action potential  
586 generation. This is likely to be *Ir25a* in light of its association with *Ir76b* orthologs in  
587 *Aedes* and *Drosophila* (18, 47). Despite the typically strong correlation between the bulk  
588 of EAG responses and grooved peg SSRs, the increased EAG responses of *Aclr76b*  
589 mutants to pyridine remain enigmatic. Taken together with the dramatic decrease in  
590 coeloconic responses of *Aclr76b* mutants to pyridine which, considering the relatively  
591 small number of coeloconic sensilla on female antennae may have a marginal impact  
592 on EAG responses, this suggests that another as-yet uncharacterized class of sensilla  
593 is responsible for this phenotype. It is intriguing to speculate that this cryptic group of  
594 sensilla may correspond to the *An. coluzzii* neurons that seem to co-express *Orco* and  
595 *Ir76b* (**Figure 1F**).

596 Our data provide *in vivo* evidence for the modulatory role of *Aclr76b* in antennal  
597 responses that is specific to amines and thus extend previous studies emphasizing the  
598 role of IRs in the detection and discrimination of amines (11, 62). Importantly, many  
599 compounds in this chemical class have been identified as human emanations and are  
600 components of odor blends that robustly attract blood-feeding Anopheline mosquitoes

601 (63, 64). In contrast to exclusive gustatory functions in *Drosophila*, mosquito labella also  
602 have olfactory capabilities (7, 49). However, despite extensive *Aclr76b* expression in the  
603 labellum of female *An. coluzzii* mosquitoes, we were unable to uncover any significant  
604 electrophysiological differences to volatile odorants between wild-type and mutant  
605 mosquitoes in ELG studies. Importantly, our data do not rule out an important gustatory  
606 role for *Aclr76b* in labellum responses to contact cues such as ammonia, carboxylic and  
607 amino acids that are present in human sweat and in blood meals themselves (65, 66).  
608 Future SSR and tip-recording studies investigating the role of labellum expression of  
609 *Aclr76b* as well as similar approaches to target the gustatory responses across the  
610 labellum and tarsi of adult *An. coluzzii* which also express *Aclr76b* will doubtlessly  
611 reveal functional roles.

612         The restriction of larval *Aclr76b* supports a direct chemosensory role of the larval  
613 peg and, moreover, is consistent with our previous RNAi-based gene-silencing studies  
614 in *An. coluzzii* demonstrating that larval behavioral responses to aqueous butylamine  
615 are mediated by *Aclr76b* (31). While we are currently unable to physiologically examine  
616 gustatory responses of the larval sensory peg to aqueous stimuli, it is nevertheless  
617 noteworthy that *Aclr76b*<sup>-/-</sup> mutant larvae display wild-type responses to a panel of  
618 volatile odorants. Taken together, these data indicate that the *Aclr76b*-associated  
619 behavioral sensitivity of *An. Coluzzii* larvae to aqueous butylamine and perhaps other  
620 related compounds (31) is a gustatory process mediated through the sensory peg.

621         Over and above the expected peripheral olfactory impacts of knocking out  
622 *Aclr76b*, we have identified novel roles in Anopheline reproductive pathways. To begin,  
623 female homozygotic *Aclr76b*<sup>-/-</sup> mutants displayed significant reductions in insemination

624 rates that persisted when mated with either wild-type or mutant males. In contrast,  
625 *Aclr76b*<sup>-/-</sup> males maintained wild-type level insemination rates when paired with wild-  
626 type females (**Figure 5A**). While these data demonstrate this phenotype is female-  
627 specific, its mechanistic basis remains unclear. We hypothesize that the *Ir76b*-related  
628 mating defect is linked to direct or volatile-based chemosensory processes on the  
629 labella and tarsi of *An. coluzzii* where *Aclr76b* expression is pronounced. *Dmlr76b* is  
630 involved in multiple gustatory pathways in *Drosophila* (25, 26) where the labella and  
631 tarsi are recognized as gustatory appendages (44, 67, 68) and where multiple studies  
632 have identified IRs on those gustatory appendages that directly promote mating (67, 69,  
633 70). While the chemosensory receptors involved in mosquito mating have not been  
634 identified molecularly, the tarsi of Anopheline mosquitoes are known to be essential for  
635 mating where they presumably detect contact mating pheromones (71–73). It is  
636 therefore reasonable to suggest that mating deficits observed in *Aclr76b*<sup>-/-</sup> females could  
637 be caused by disruption of recognition pathways that are dependent on *Ir76b*-mediated  
638 gustatory signaling.

639 In addition to the mating deficits that impede propagation of homozygous  
640 *Aclr76b*<sup>-/-</sup> lines, the profound absence of successful blood feeding of *Aclr76b*<sup>-/-</sup> females  
641 requires heterozygotic maintenance of these lines. Despite the ability of these mutants  
642 to exhibit wild-type levels of sugar feeding and, importantly, to be fully able to locate,  
643 alight on and even probe blood-containing membrane feeders that are supplemented  
644 with human foot-odor blends and CO<sub>2</sub>, *Aclr76b*<sup>-/-</sup> females fail to actually take-up (ingest)  
645 their blood meals. In *Ae. aegypti*, the labial stylets that are essential for gustatory  
646 sampling (tasting) of blood house neurons that respond to whole blood that is rich in

647 amino acids (74) and more specifically to ATP, NaHCO<sub>3</sub>, and NaCl (59). More  
648 importantly, while the cognate IR co-receptors responsible for those responses remain  
649 uncharacterized, two *Aedes* IRs—*Ir7a* and *Ir7f*—acting as ‘tuning’ receptors are  
650 specifically expressed on the stylet neurons where they directly recognize those blood-  
651 specific tastant cues to activate the uptake of blood to complete blood feeding (59). In  
652 light of the robust expression of *Aclr76b* in the stylets of adult females, it is reasonable  
653 to postulate that *Aclr76b* is the gustatory IR co-receptor that is directly involved in blood  
654 tasting in *An. coluzzii*. That *Aclr76b*<sup>-/-</sup> mutations specifically block the uptake of blood by  
655 female mosquitoes that have located, alighted on and probed membrane feeders  
656 provides validation for this hypothesis. Inasmuch as blood feeding is paramount for *An.*  
657 *coluzzii* and other mosquitoes to reproduce and to acquire and transmit disease  
658 pathogens, the crucial role of *Ir76b* in this behavior makes it a provocative target for the  
659 development of novel strategies to reduce mosquito vectorial capacity.

660 **Author contributions**

661 Conceived experiments: ZY, FL, HS and LJZ; Performed research: ZY, FL, HS, and AB;

662 Analyzed data: ZY, FL, HS, and AB; Wrote the paper: ZY, FL, HS, AB, and LJZ.

663 Approved the final manuscript: ZY, FL, HS, AB, and LJZ.

664

665 **Acknowledgements**

666 We thank Zhen Li for mosquito rearing, Dr. H. Willi Honegger for critical comments, and

667 all members of the Zwiebel lab for suggestions. We are very grateful to Dr. Christopher

668 Potter (The Johns Hopkins University School of Medicine) for the generous gift of Q

669 system mosquito lines. We thank Dr. A.M. McAinsh for scientific copy-editing and

670 acknowledge the Vanderbilt University Cell Imaging Shared Resource Core for training

671 and use of the Olympus FV-1000 confocal microscope. This work was conducted with

672 the support of Vanderbilt University and a grant from the National Institutes of Health

673 (NIAID, AI127693) to LJZ.

674 **References**

- 675 1. M. Coetzee, *et al.*, *Anopheles coluzzii* and *Anopheles amharicus*, new members  
676 of the *Anopheles gambiae* complex. *Zootaxa* **3619**, 246–274 (2013).
- 677 2. A. Molina-Cruz, M. M. Zilversmit, D. E. Neafsey, D. L. Hartl, C. Barillas-Mury,  
678 Mosquito vectors and the globalization of *Plasmodium falciparum* malaria. *Annu.*  
679 *Rev. Genet.* **50**, 447–465 (2016).
- 680 3. F. Van Breugel, J. Riffell, A. Fairhall, M. H. Dickinson, Mosquitoes use vision to  
681 associate odor plumes with thermal targets. *Curr. Biol.* **25**, 2123–2129 (2015).
- 682 4. C. Montell, L. J. Zwiebel, Mosquito sensory systems. *Adv. In Insect Phys.* **51**,  
683 293–328 (2016).
- 684 5. T. Lu, *et al.*, Odor coding in the maxillary palp of the malaria vector mosquito  
685 *Anopheles gambiae*. *Curr. Biol.* **17**, 1533–1544 (2007).
- 686 6. Y. T. Qiu, J. J. A. van Loon, W. Takken, J. Meijerink, H. M. Smid, Olfactory coding  
687 in antennal neurons of the malaria mosquito, *Anopheles gambiae*. *Chem. Senses*  
688 **31**, 845–863 (2006).
- 689 7. H. W. Kwon, T. Lu, M. Rützler, L. J. Zwiebel, Olfactory response in a gustatory  
690 organ of the malaria vector mosquito *Anopheles gambiae*. *Proc. Natl. Acad. Sci.*  
691 *U. S. A.* **103**, 13526–13531 (2006).
- 692 8. F. Guidobaldi, I. J. May-Concha, P. G. Guerenstein, Morphology and physiology  
693 of the olfactory system of blood-feeding insects. *J. Physiol. Paris* **108**, 96–111  
694 (2014).



- 695 9. S. B. McIver, Sensilla of mosquitoes (Diptera: Culicidae). *J. Med. Entomol.* **19**,  
696 489–535 (1982).
- 697 10. R. J. Pitts, A. N. Fox, L. J. Zwiebeil, A highly conserved candidate chemoreceptor  
698 expressed in both olfactory and gustatory tissues in the malaria vector *Anopheles*  
699 *gambiae*. *Proc. Natl. Acad. Sci. U. S. A.* **101**, 5058–5063 (2004).
- 700 11. R. J. Pitts, S. L. Derryberry, Z. Zhang, L. J. Zwiebel, Variant ionotropic receptors  
701 in the malaria vector mosquito *Anopheles gambiae* tuned to amines and  
702 carboxylic acids. *Sci. Rep.* **7** (2017).
- 703 12. G. Wang, A. F. Carey, J. R. Carlson, L. J. Zwiebel, Molecular basis of odor coding  
704 in the malaria vector mosquito *Anopheles gambiae*. *Proc. Natl. Acad. Sci. U. S. A.*  
705 **107**, 4418–4423 (2010).
- 706 13. A. F. Carey, G. Wang, C. Y. Su, L. J. Zwiebel, J. R. Carlson, Odorant reception in  
707 the malaria mosquito *Anopheles gambiae*. *Nature* **464**, 66–71 (2010).
- 708 14. R. J. Pitts, L. J. Zwiebel, Antennal sensilla of two female Anopheline sibling  
709 species with differing host ranges. *Malar. J.* **5** (2006).
- 710 15. Z. Ye, *et al.*, Ammonium transporter AcAmt mutagenesis uncovers reproductive  
711 and physiological defects without impacting olfactory responses to ammonia in  
712 the malaria vector mosquito *Anopheles coluzzii*. *Insect Biochem. Mol. Biol.* **134**,  
713 103578 (2021).
- 714 16. Z. Ye, *et al.*, Heterogeneous expression of the ammonium transporter AgAmt in  
715 chemosensory appendages of the malaria vector, *Anopheles gambiae*. *Insect*

- 716 *Biochem. Mol. Biol.* **120** (2020).
- 717 17. K. Sato, *et al.*, Insect olfactory receptors are heteromeric ligand-gated ion  
718 channels. *Nature* **452**, 1002–1006 (2008).
- 719 18. R. Benton, K. S. Vannice, C. Gomez-Diaz, L. B. Vosshall, Variant ionotropic  
720 glutamate receptors as chemosensory receptors in *Drosophila*. *Cell* **136**, 149–162  
721 (2009).
- 722 19. L. Abuin, *et al.*, Functional Architecture of Olfactory Ionotropic Glutamate  
723 Receptors. *Neuron* **69**, 44–60 (2011).
- 724 20. J. A. Butterwick, *et al.*, Cryo-EM structure of the insect olfactory receptor Orco.  
725 *Nature* **560**, 447–452 (2018).
- 726 21. M. Degennaro, *et al.*, Orco mutant mosquitoes lose strong preference for humans  
727 and are not repelled by volatile DEET. *Nature* **498**, 487–491 (2013).
- 728 22. H. Sun, F. Liu, Z. Ye, A. Baker, L. J. Zwiebel, Mutagenesis of the orco odorant  
729 receptor co-receptor impairs olfactory function in the malaria vector *Anopheles*  
730 *coluzzii*. *Insect Biochem. Mol. Biol.* **127** (2020).
- 731 23. C. A. Yao, R. Ignell, J. R. Carlson, Chemosensory coding by neurons in the  
732 coeloconic sensilla of the *Drosophila* antenna. *J. Neurosci.* **25**, 8359–8367 (2005).
- 733 24. A. Vulpe, P. Mohapatra, K. Menuz, Functional characterization of odor responses  
734 and gene expression changes in olfactory co-receptor mutants in *Drosophila*.  
735 *bioRxiv* (2021) <https://doi.org/10.1101/2021.06.18.449017> (June 26, 2021).
- 736 25. Y. V. Zhang, J. Ni, C. Montell, The molecular basis for attractive salt-taste coding

- 737 in *Drosophila*. *Science* **340**, 1334–1338 (2013).
- 738 26. A. Ganguly, *et al.*, A molecular and cellular context-dependent role for Ir76b in  
739 detection of amino acid taste. *Cell Rep.* **18**, 737–750 (2017).
- 740 27. L. Ni, *et al.*, The ionotropic receptors IR21a and IR25a mediate cool sensing in  
741 *Drosophila*. *Elife* **5** (2016).
- 742 28. A. Enjin, *et al.*, Humidity sensing in *Drosophila*. *Curr. Biol.* **26**, 1352–1358 (2016).
- 743 29. S. Min, M. Ai, S. A. Shin, G. S. B. Suh, Dedicated olfactory neurons mediating  
744 attraction behavior to ammonia and amines in *Drosophila*. *Proc. Natl. Acad. Sci.*  
745 *U. S. A.* **110**, 1321–1329 (2013).
- 746 30. J. I. Raji, *et al.*, *Aedes aegypti* mosquitoes detect acidic volatiles found in human  
747 odor using the IR8a pathway. *Curr. Biol.* **29**, 1253-1262.e7 (2019).
- 748 31. C. Liu, *et al.*, Distinct olfactory signaling mechanisms in the malaria vector  
749 mosquito *Anopheles gambiae*. *PLoS Biol.* **8**, 27–28 (2010).
- 750 32. C. J. Potter, B. Tasic, E. V. Russler, L. Liang, L. Luo, The Q system: A repressible  
751 binary system for transgene expression, lineage tracing, and mosaic analysis.  
752 *Cell* **141**, 536–548 (2010).
- 753 33. A. N. Fox, R. J. Pitts, H. M. Robertson, J. R. Carlson, L. J. Zwiebel, Candidate  
754 odorant receptors from the malaria vector mosquito *Anopheles gambiae* and  
755 evidence of down-regulation in response to blood feeding. *Proc. Natl. Acad. Sci.*  
756 *U. S. A.* **98**, 14693–14697 (2001).
- 757 34. E. Suh, D. H. Choe, A. M. Saveer, L. J. Zwiebel, Suboptimal larval habitats

- 758 modulate oviposition of the malaria vector mosquito *Anopheles coluzzii*. *PLoS*  
759 *One* **11** (2016).
- 760 35. F. Liu, Z. Ye, A. Baker, H. Sun, L. J. Zwiebel, Gene editing reveals obligate and  
761 modulatory components of the CO<sub>2</sub> receptor complex in the malaria vector  
762 mosquito, *Anopheles coluzzii*. *Insect Biochem. Mol. Biol.* **127** (2020).
- 763 36. A. Hammond, *et al.*, A CRISPR-Cas9 gene drive system targeting female  
764 reproduction in the malaria mosquito vector *Anopheles gambiae*. *Nat. Biotechnol.*  
765 **34**, 78–83 (2016).
- 766 37. K. Labun, *et al.*, CHOPCHOP v3: Expanding the CRISPR web toolbox beyond  
767 genome editing. *Nucleic Acids Res.* **47**, W171–W174 (2019).
- 768 38. E. Pondeville, *et al.*, Efficient  $\phi$ c31 integrase-mediated site-specific germline  
769 transformation of *Anopheles gambiae*. *Nat. Protoc.* **9**, 1698–1712 (2014).
- 770 39. B. J. Matthews, M. A. Younger, L. B. Vosshall, The ion channel ppk301 controls  
771 freshwater egg-laying in the mosquito *Aedes aegypti*. *Elife* **8** (2019).
- 772 40. F. Liu, L. Chen, A. G. Appel, N. Liu, Olfactory responses of the antennal trichoid  
773 sensilla to chemical repellents in the mosquito, *Culex quinquefasciatus*. *J. Insect*  
774 *Physiol.* **59**, 1169–1177 (2013).
- 775 41. H. Sun, F. Liu, A. Baker, L. J. Zwiebel, Neuronal odor coding in the larval sensory  
776 cone of *Anopheles coluzzii*: Complex responses from a simple system. *bioRxiv*  
777 (2020) <https://doi.org/10.1101/2020.09.09.290544>.
- 778 42. C. J. Den Otter, M. Behan, F. W. Maes, Single cell responses in female *Pieris*

- 779 *brassicae* (Lepidoptera: Pieridae) to plant volatiles and conspecific egg odours. *J.*  
780 *Insect Physiol.* **26**, 465–472 (1980).
- 781 43. R. J. Pitts, C. Liu, X. Zhou, J. C. Malpartida, L. J. Zwiebel, Odorant receptor-  
782 mediated sperm activation in disease vector mosquitoes. *Proc. Natl. Acad. Sci. U.*  
783 *S. A.* **111**, 2566–2571 (2014).
- 784 44. E. J. Dennis, O. V. Goldman, L. B. Vosshall, *Aedes aegypti* mosquitoes use their  
785 legs to sense DEET on contact. *Curr. Biol.* **29**, 1551-1556.e5 (2019).
- 786 45. O. Riabinina, *et al.*, Organization of olfactory centres in the malaria mosquito  
787 *Anopheles gambiae*. *Nat. Commun.* **7** (2016).
- 788 46. F. Diao, B. H. White, A novel approach for directing transgene expression in  
789 *Drosophila*: T2A-Gal4 in-frame fusion. *Genetics* **190**, 1139–1144 (2012).
- 790 47. M. A. Younger, *et al.*, Non-canonical odor coding ensures unbreakable mosquito  
791 attraction to humans. *bioRxiv* (2020) <https://doi.org/10.1101/2020.11.07.368720>.
- 792 48. D. Task, *et al.*, Widespread polymodal chemosensory receptor expression in  
793 *Drosophila* olfactory neurons. *bioRxiv* (2020)  
794 <https://doi.org/10.1101/2020.11.07.355651>.
- 795 49. A. M. Saveer, R. J. Pitts, S. T. Ferguson, L. J. Zwiebel, Characterization of  
796 chemosensory responses on the labellum of the malaria vector mosquito,  
797 *Anopheles coluzzii*. *Sci. Rep.* **8** (2018).
- 798 50. R. J. Pitts, D. C. Rinker, P. L. Jones, A. Rokas, L. J. Zwiebel, Transcriptome  
799 profiling of chemosensory appendages in the malaria vector *Anopheles gambiae*

- 800 reveals tissue- and sex-specific signatures of odor coding. *BMC Genomics* **12**  
801 (2011).
- 802 51. G. Athrey, *et al.*, Chemosensory gene expression in olfactory organs of the  
803 anthropophilic *Anopheles coluzzii* and zoophilic *Anopheles quadriannulatus*. *BMC*  
804 *Genomics* **18** (2017).
- 805 52. Y. Xia, *et al.*, The molecular and cellular basis of olfactory-driven behavior in  
806 *Anopheles gambiae* larvae. *Proc. Natl. Acad. Sci. U. S. A.* **105**, 6433–6438  
807 (2008).
- 808 53. D. Nicastro, R. R. Melzer, H. Hruschka, U. Smola, Evolution of small sense  
809 organs: Sensilla on the larval antennae traced back to the origin of the Diptera.  
810 *Naturwissenschaften* **85**, 501–505 (1998).
- 811 54. C. J. McMeniman, R. A. Corfas, B. J. Matthews, S. A. Ritchie, L. B. Vosshall,  
812 Multimodal integration of carbon dioxide and other sensory cues drives mosquito  
813 attraction to humans. *Cell* **156**, 1060–1071 (2014).
- 814 55. J. D. Charlwood, *et al.*, “A mate or a meal” - pre-gravid behaviour of female  
815 *Anopheles gambiae* from the islands of São Tomé and Príncipe, West Africa.  
816 *Malar. J.* **2**, 1–11 (2003).
- 817 56. T. W. Scott, W. Takken, Feeding strategies of anthropophilic mosquitoes result in  
818 increased risk of pathogen transmission. *Trends Parasitol.* **28**, 114–121 (2012).
- 819 57. C. M. Stone, I. M. Hamilton, W. A. Foster, A survival and reproduction trade-off is  
820 resolved in accordance with resource availability by virgin female mosquitoes.

- 821 *Anim. Behav.* **81**, 765–774 (2011).
- 822 58. R. M. Gordon, W. H. R. Lumsden, A study of the behaviour of the mouth-parts of  
823 mosquitoes when taking up blood from living tissue; together with some  
824 observations on the ingestion of microfilariae. *Ann. Trop. Med. Parasitol.* **33**, 259–  
825 278 (1939).
- 826 59. V. Jové, *et al.*, Sensory discrimination of blood and floral nectar by *Aedes aegypti*  
827 mosquitoes. *Neuron* **108**, 1163-1180.e12 (2020).
- 828 60. A. Ray, Reception of odors and repellents in mosquitoes. *Curr. Opin. Neurobiol.*  
829 **34**, 158–164 (2015).
- 830 61. H. L. Chen, U. Stern, C. H. Yang, Molecular control limiting sensitivity of sweet  
831 taste neurons in *Drosophila*. *Proc. Natl. Acad. Sci. U. S. A.* (2019)  
832 <https://doi.org/10.1073/pnas.1911583116>.
- 833 62. A. Hussain, *et al.*, Ionotropic chemosensory receptors mediate the taste and smell  
834 of polyamines. *PLoS Biol.* **14** (2016).
- 835 63. C. K. Mweresa, *et al.*, Enhancing attraction of African malaria vectors to a  
836 synthetic odor blend. *J. Chem. Ecol.* **42**, 508–516 (2016).
- 837 64. R. I. Ellin, *et al.*, An apparatus for the detected and quantitation of volatile human  
838 effluents. *J. Chromatogr. A* **100**, 137–152 (1974).
- 839 65. L. B. Baker, Physiology of sweat gland function: The roles of sweating and sweat  
840 composition in human health. *Temperature* **6**, 211–259 (2019).
- 841 66. R. C. Burke, T. H. Lee, V. Buettner-Janusch, Free amino acids and water soluble

- 842 peptides in stratum corneum and skin surface film in human beings. *Yale J. Biol.*  
843 *Med.* **38**, 355–373 (1966).
- 844 67. C. Montell, A taste of the *Drosophila* gustatory receptors. *Curr. Opin. Neurobiol.*  
845 **19**, 345–353 (2009).
- 846 68. J. T. Sparks, B. T. Vinyard, J. C. Dickens, Gustatory receptor expression in the  
847 labella and tarsi of *Aedes aegypti*. *Insect Biochem. Mol. Biol.* **43**, 1161–1171  
848 (2013).
- 849 69. Z. He, Y. Luo, X. Shang, J. S. Sun, J. R. Carlson, Chemosensory sensilla of the  
850 *Drosophila* wing express a candidate ionotropic pheromone receptor. *PLoS Biol.*  
851 (2019) <https://doi.org/10.1371/journal.pbio.2006619>.
- 852 70. T. W. Koh, *et al.*, The *Drosophila* IR20a clade of ionotropic receptors are  
853 candidate taste and pheromone receptors. *Neuron* **83**, 850–865 (2014).
- 854 71. A. Diabate, F. Tripet, Targeting male mosquito mating behaviour for malaria  
855 control. *Parasites and Vectors* **8** (2015).
- 856 72. L. S. Baik, J. R. Carlson, The mosquito taste system and disease control. *Proc.*  
857 *Natl. Acad. Sci. U. S. A.* **117**, 32848–32856 (2020).
- 858 73. J. D. Charlwood, M. D. R. Jones, Mating behaviour in the mosquito, *Anopheles*  
859 *gambiae* s.l. I. Close range and contact behaviour. *Physiol. Entomol.* **4**, 111–120  
860 (1979).
- 861 74. A. M. Proenza, A. Palou, P. Roca, Amino acid distribution in human blood: A  
862 significant pool of amino acids is adsorbed onto blood cell membranes. *Biochem.*



863 *Mol. Biol. Int.* **34**, 971–982 (1994).

864

865 **Figure legends**

866 **Figure 1. (A)** *Aclr76b-QF2* driver line schematics. The *T2A-QF2-3xP3-DsRed* element  
867 was inserted into the first exon of *Aclr76b* via CRISPR-mediated homologous  
868 recombination. A pair of primers (*lr76b\_F* and *lr76b\_R*) were used for genomic PCR  
869 validation. The wild type produces a 442-bp amplicon whereas the *Aclr76b-QF2* driver  
870 allele gives rise to a 3011-bp amplicon. **(B)** Agarose electrophoresis of genomic PCR  
871 validation of wild type (WT) and driver (*lr76b-QF2*). **(C)** Representative bright-field  
872 image (left) with GFP fluorescence overlay confocal z-stack projects (right) of whole-  
873 mount female antennae indicating *Aclr76b* is expressed in grooved pegs on 6<sup>th</sup>  
874 flagellomere and **(D)** 13<sup>th</sup> flagellomere (highlighted by arrows). **(E)** A representative  
875 confocal optical section of the female antennae immunohistochemically labelled with  $\alpha$ -  
876 Orco antisera (red) and *Aclr76b* (green) indicating that *Aclr76b* and Orco are localized  
877 in distinct cells. **(F)** A representative confocal optical section of a female antenna  
878 showing *Aclr76b* and Orco are co-localized in a cell (highlighted by an arrow and  
879 enlarged within dashed lines). **(G)** A representative confocal Z-stack project of a whole-  
880 mount female labellum showing *Aclr76b* is expressed in dendrites in T1 and T2 sensilla  
881 (highlighted by arrows. Scale bars = 20 $\mu$ m). **(H)** A representative confocal optical  
882 section of a female labellum showing *Aclr76b* and Orco are co-localized in a cell  
883 (highlighted by an arrow and enlarged within dashed lines). Nuclei were labelled with  
884 DAPI. Scale bars = 10 $\mu$ m.

885 **Figure 2. (A)** *Aclr76b* mutagenesis schematics. The *3xP3-DeRed* element was inserted  
886 into the first exon of *Aclr76b* via CRISPR-mediated homologous recombination. A pair  
887 of primers (*lr76b\_F* and *lr76b\_R*) were used for PCR validation. The wild-type genome

888 produces a 442-bp amplicon whereas the mutant allele gives rise to a 1667-bp  
889 amplicon. **(B)** Agarose electrophoresis of genomic PCR validation of wild type (WT),  
890 heterozygotes ( $Ir76b^{+/-}$ ), homozygotes ( $Ir76b^{-/-}$ ) templates. **(C)** Representative EAG  
891 recordings of wild-type (WT) and  $Aclr76b^{-/-}$  ( $Ir76b^{-/-}$ ) females in response to paraffin oil  
892 (solvent) and a panel of amines including (a) pyridine, (b) pyrrolidine, (c) 3-  
893 methylpiperidine, (d) 3-pyrroline, and (e) 1-butylamine. The red bars indicate stimulus  
894 duration (0.5s). **(D)** Average EAG responses to a panel of acids and amines. Multiple t-  
895 tests using Holm-Sidak method (N=8) suggest responses to amines in  $Aclr76b$  mutants  
896 are significantly higher than in wild type. Responses were normalized to the solvent  
897 responses. Significance levels are depicted with asterisks: p-value < 0.05 (\*); p-value <  
898 0.01 (\*\*); p-value < 0.001 (\*\*\*). Error bars = Standard error of the mean.

899 **Figure 3. (A)** Heatmaps showing average female grooved peg SSR responses to  
900 amines in the wild-type (WT) and  $Aclr76b^{-/-}$  ( $Ir76b^{-/-}$ ) females. Each column depicts a  
901 single replicate. The color scale marks the response amplitude from the highest (125  
902 spikes/s, red) to the lowest (-50 spikes/s, blue). Responses were normalized by  
903 subtracting the solvent responses. **(B)** Average female grooved peg SSR responses.  
904 Multiple t-tests using Holm-Sidak method (N=14) suggest responses to amines in  
905  $Aclr76b$  mutants are significantly higher than in wild type. **(C)** Average female grooved  
906 peg spontaneous (background) neuronal activity. Non-parametric t-test suggests no  
907 significant differences between  $Aclr76b$  mutants and wild-type genotypes. **(D)** Average  
908 female grooved peg post-stimulus responses. Multiple t-tests using Holm-Sidak method  
909 (N=13) suggest post-stimulus “OFF” responses to 3-methylpiperidine in  $Aclr76b$   
910 mutants are significantly higher than in wild type. **(E)** Average female trichoid SSR

911 responses. Multiple t-tests using Holm-Sidak method (N=6) suggest no significant  
912 differences between *Aclr76b* mutants and the wild type. Significance levels are depicted  
913 with asterisks: p-value < 0.05 (\*); p-value < 0.01 (\*\*); p-value < 0.001 (\*\*\*). Error bars =  
914 Standard error of the mean.

915 **Figure 4. (A)** Heatmaps showing average female coeloconic sensillum SSR responses  
916 to acids and amines in the wild-type (WT) and *Aclr76b*<sup>-/-</sup> (*lr76b*<sup>-/-</sup>) females. Each column  
917 depicts a single replicate. The color scale marks the response amplitude from the  
918 highest (200 spikes/s, red) to the lowest (-20 spikes/s, white). Responses were  
919 normalized by subtracting the solvent responses. **(B)** Average female coeloconic  
920 sensillar spontaneous (background) neuronal activity. Non-parametric t-test suggests no  
921 significant differences between *Aclr76b* mutants and the wild type. **(C)** Average female  
922 coeloconic sensillum SSR responses. Multiple t-tests using Holm-Sidak method (N=25-  
923 26) suggest responses to specific acids and amines in *Aclr76b* mutants are significantly  
924 lower than in wild type. **(D)** Average female coeloconic sensillar post-stimulus “OFF”  
925 responses. Multiple t-tests using Holm-Sidak method (N=25-26) suggest post-stimulus  
926 responses to acids and amines are significantly different in *Aclr76b* mutants than in wild  
927 type. Significance levels are depicted with asterisks: p-value < 0.05 (\*); p-value < 0.01  
928 (\*\*); p-value < 0.001 (\*\*\*). Error bars = Standard error of the mean.

929 **Figure 5. (A)** Average insemination rate of females in different mating pairs. Mean  
930 values with different grouping letters were significantly different (N=5; one-way ANOVA;  
931 p-value < 0.05). **(B)** Average landing counts per female mosquito on the blood feeder  
932 during blood feeding. Non-parametric t-test suggests no significant differences between  
933 *Aclr76b* mutants and the wild type. **(C)** Average blood feeding rate of wild-type (WT),

934 virgin wild-type (WT (Virgin)), and *Aclr76b*<sup>-/-</sup> (*lr76b*<sup>-/-</sup>) females in the 25-min bioassay.  
935 Mean values with different grouping letters were significantly different (N=4-7; one-way  
936 ANOVA; p-value < 0.05). **(D)** A representative confocal z-stack project of female stylet  
937 showing *Aclr76b* expressions. Scale bars = 10µm. **(E)** Average sugar consumptions of  
938 female mosquitoes in the CAFE bioassay. Non-parametric t-test suggests no significant  
939 differences between *Aclr76b* mutants and the wild type. Error bars = Standard error of  
940 the mean.

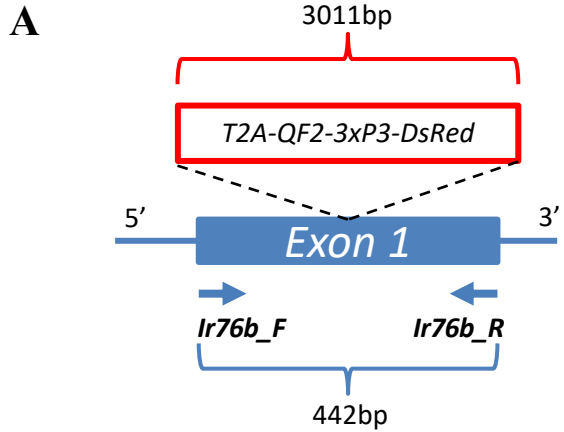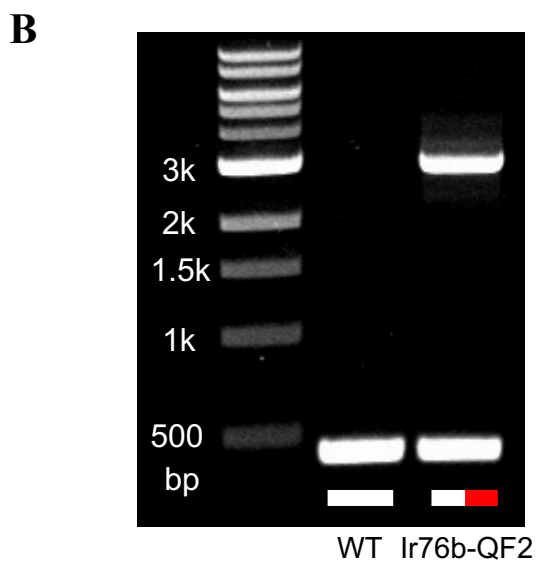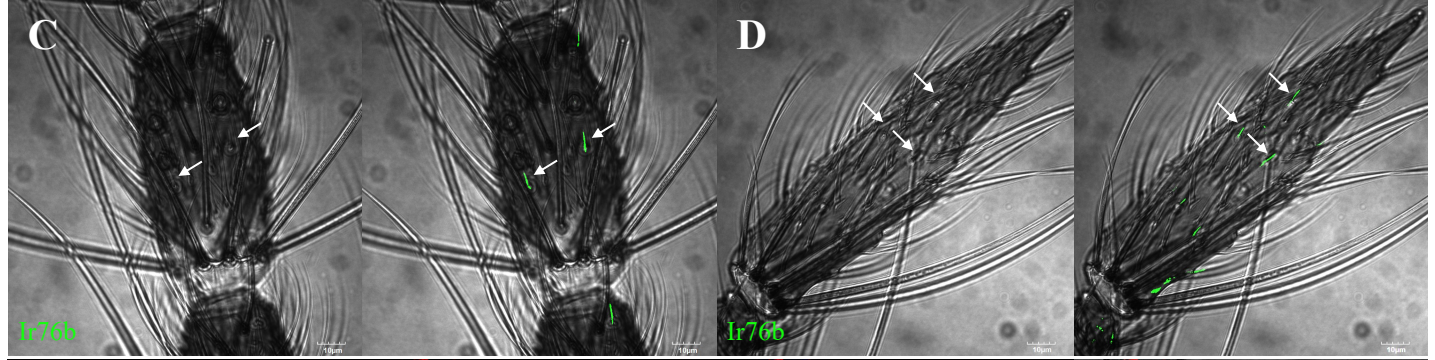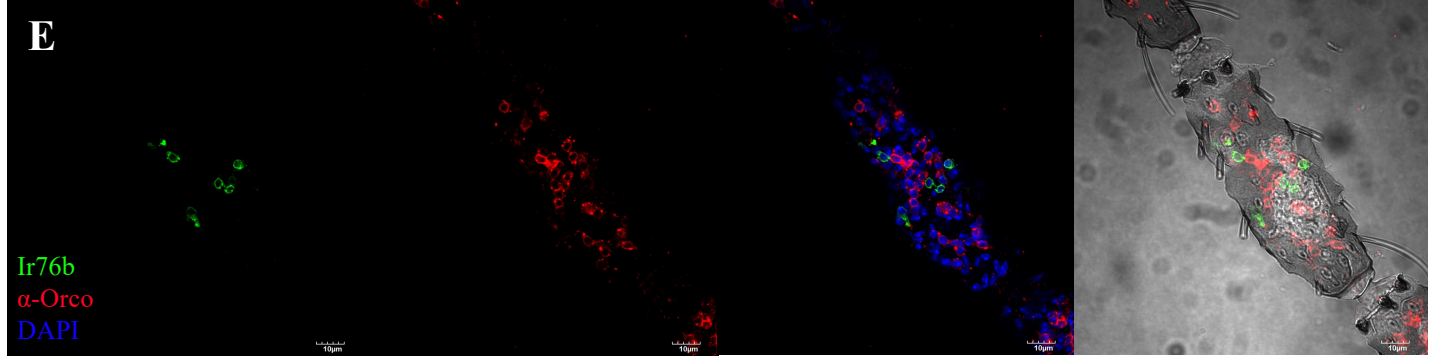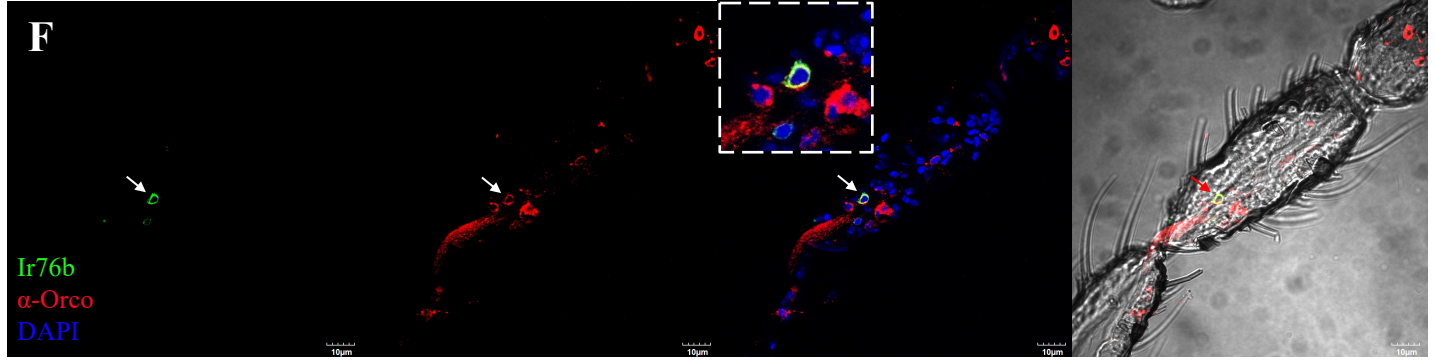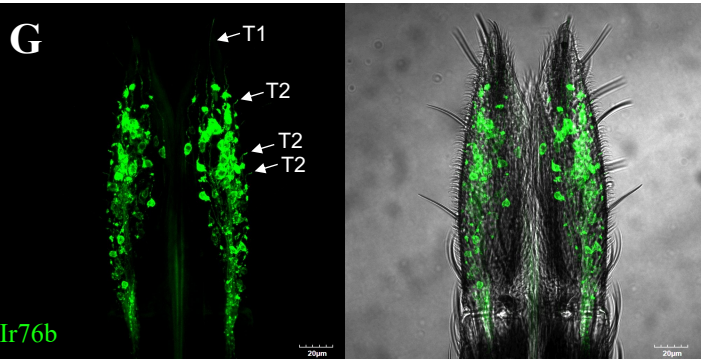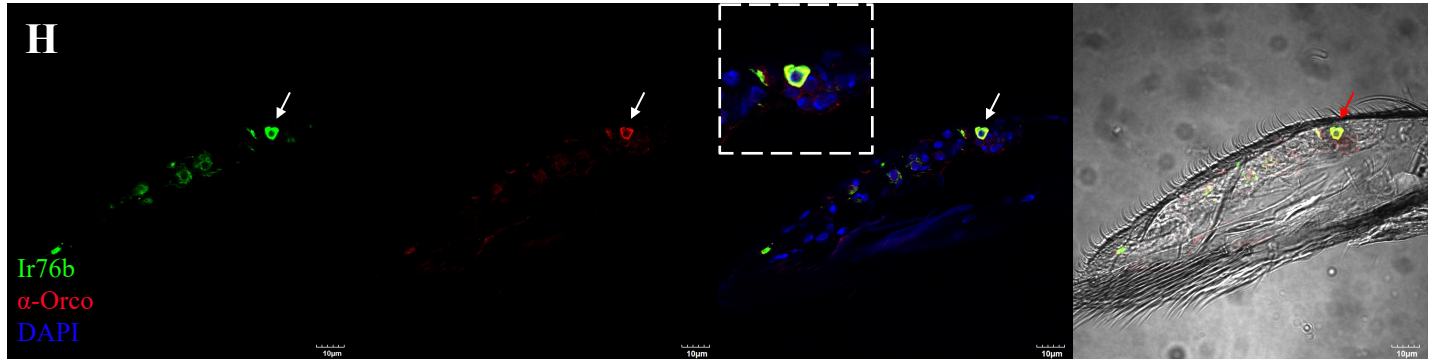

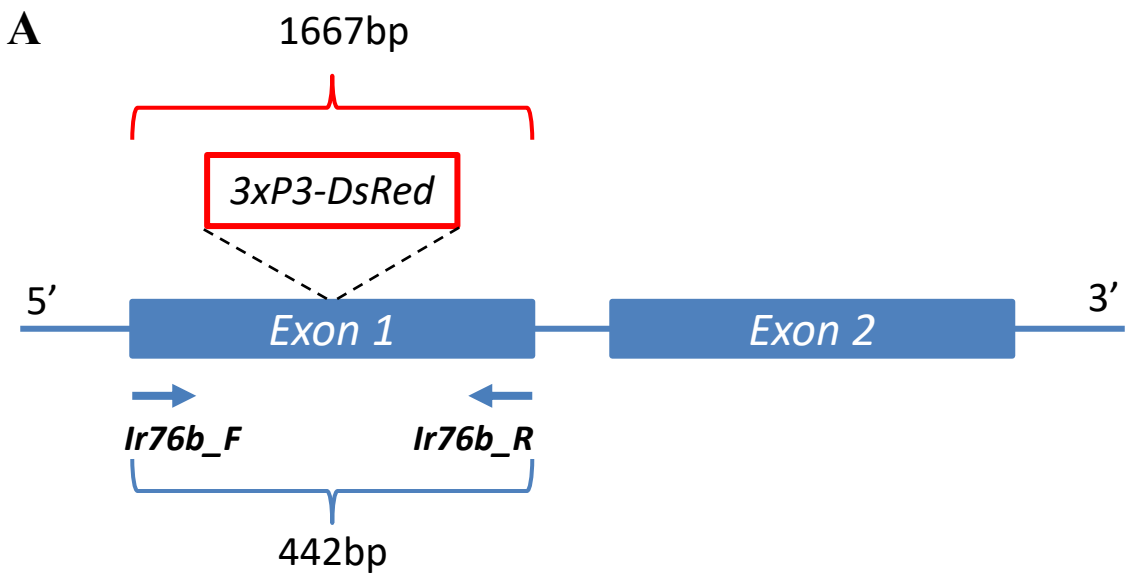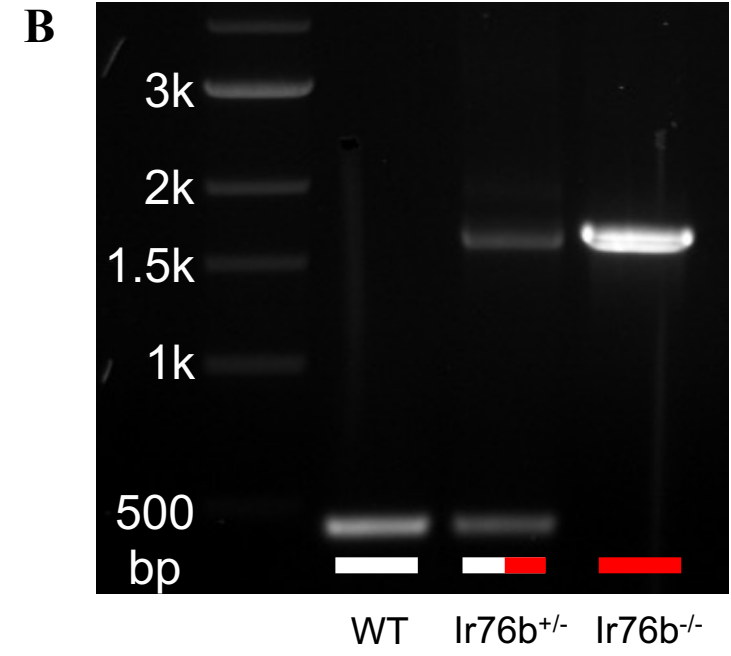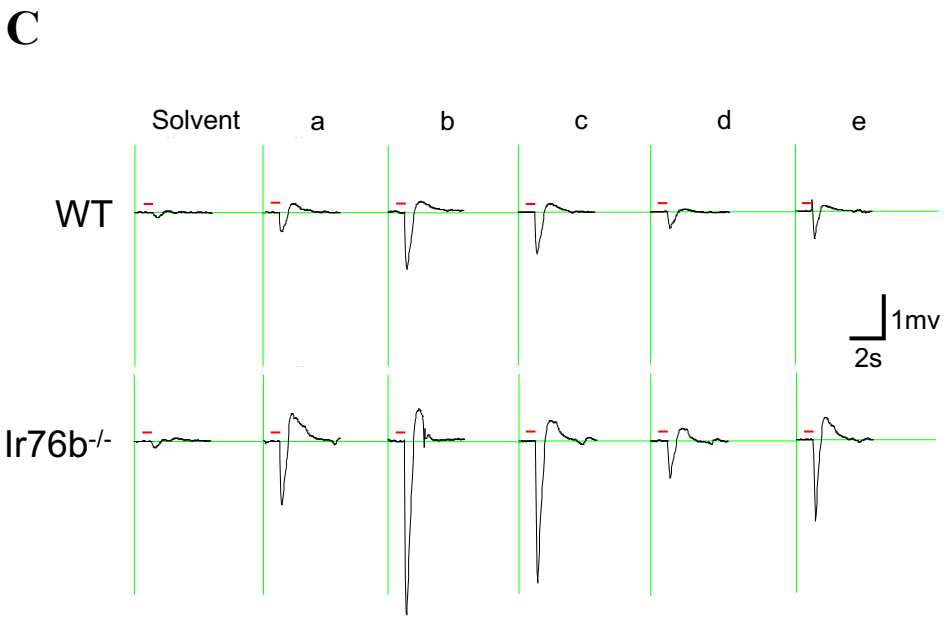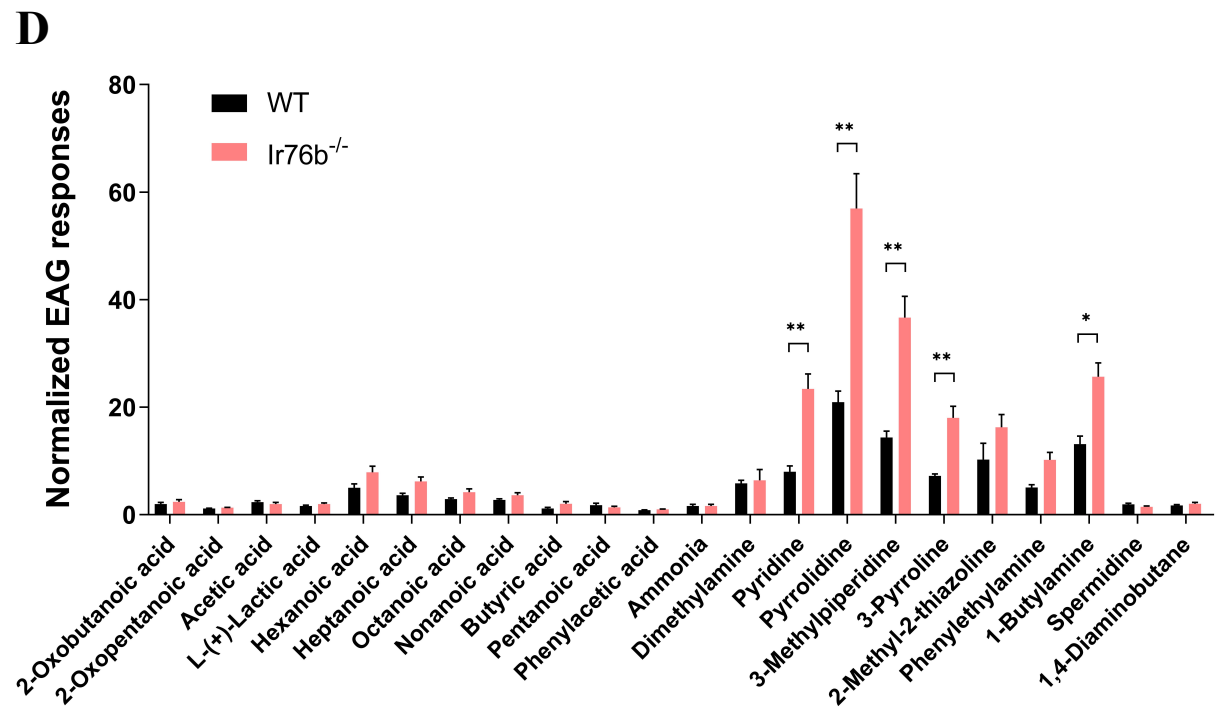

**A****WT**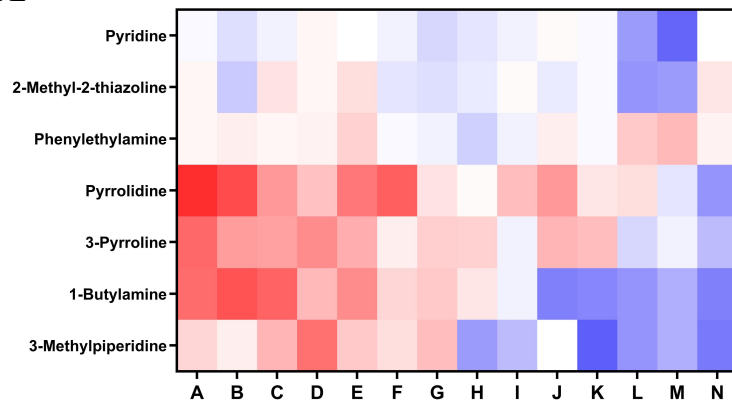**Ir76b<sup>-/-</sup>**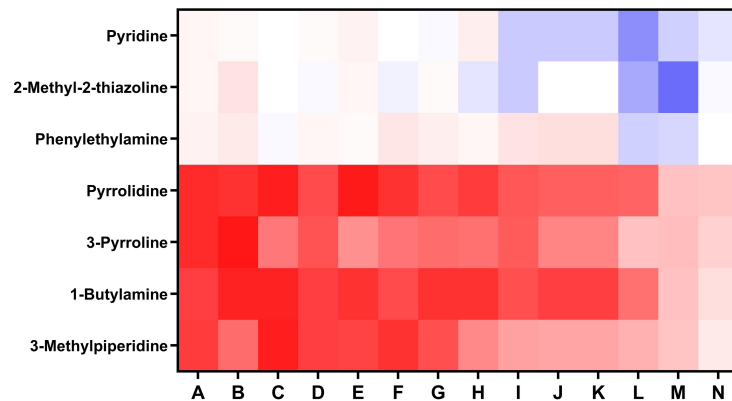**B**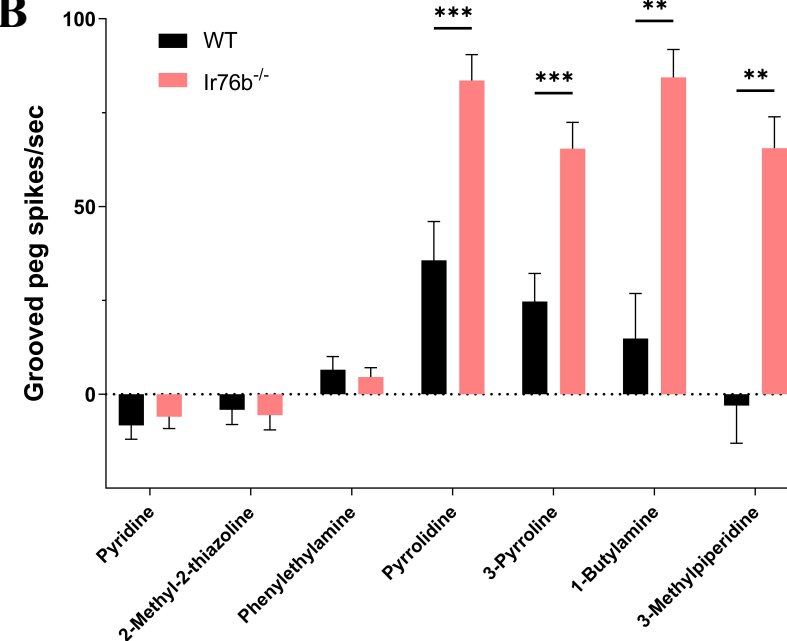**C**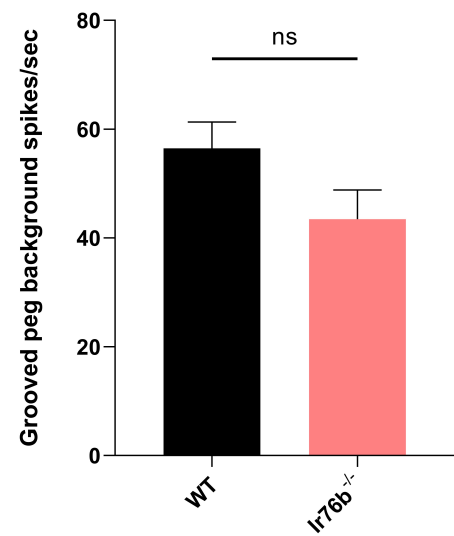**D**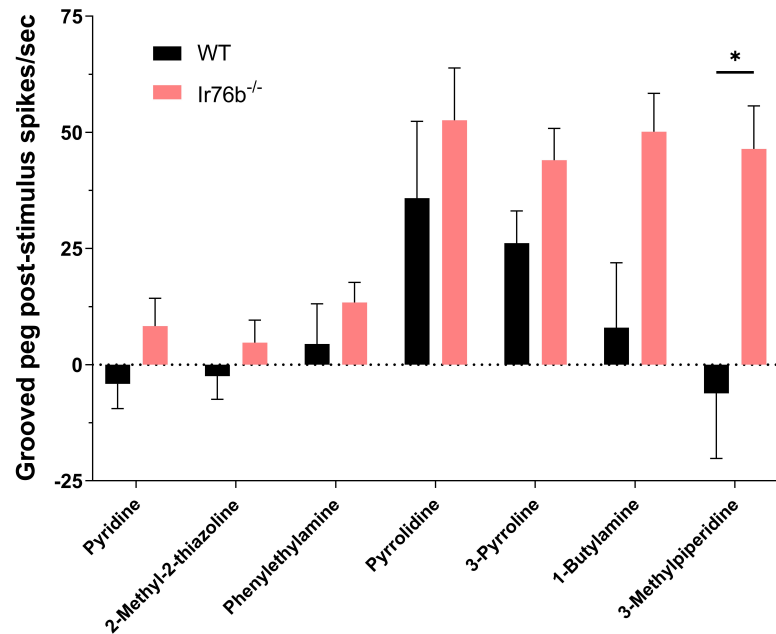**E**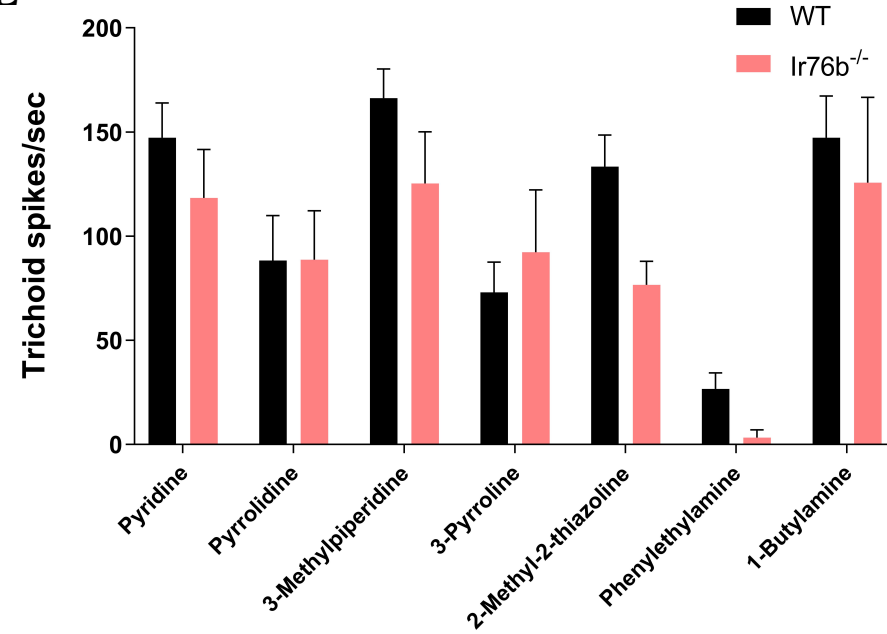



**A**

WT

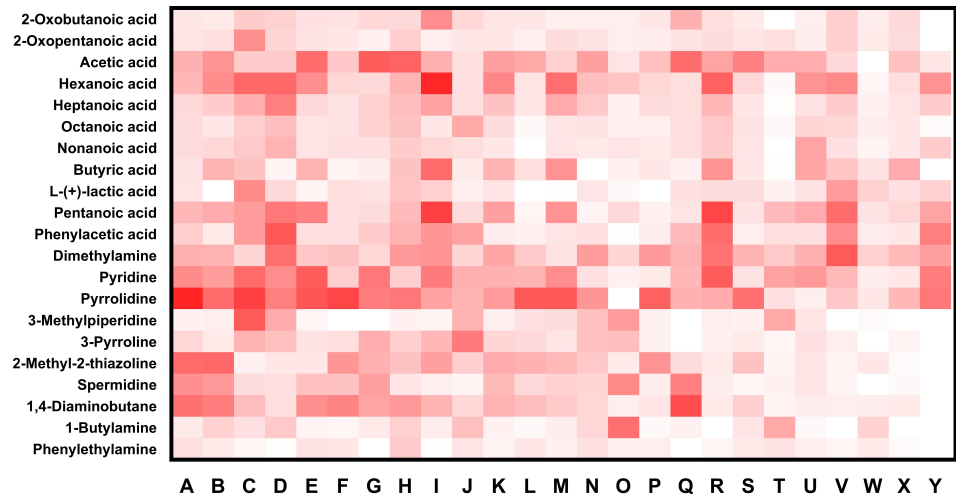Ir76b<sup>-/-</sup>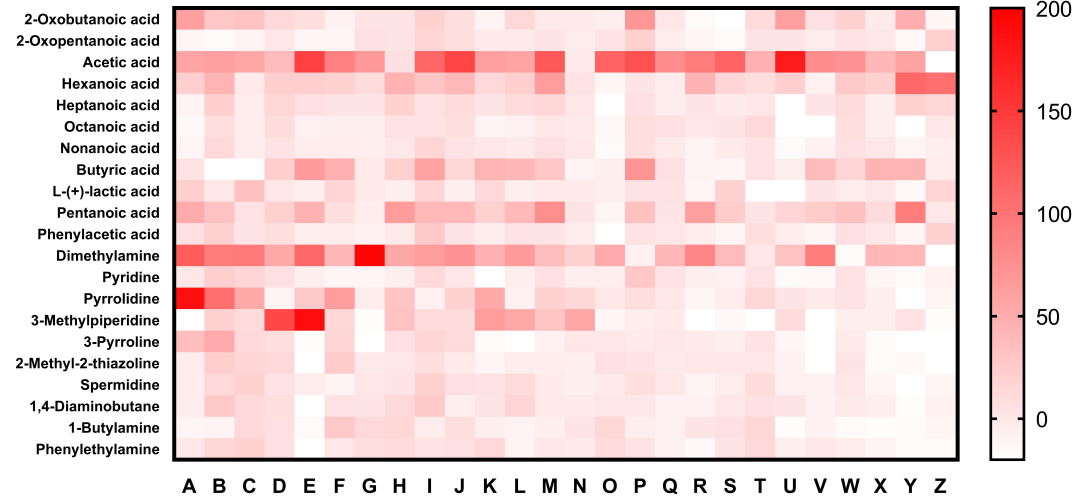**B**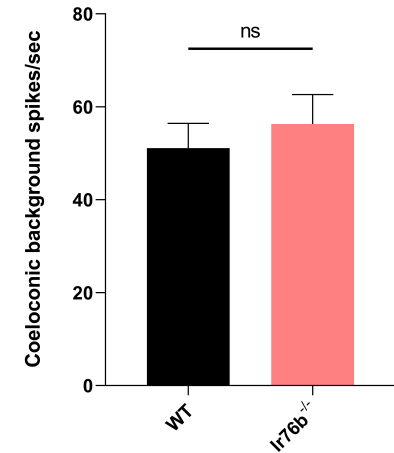**C**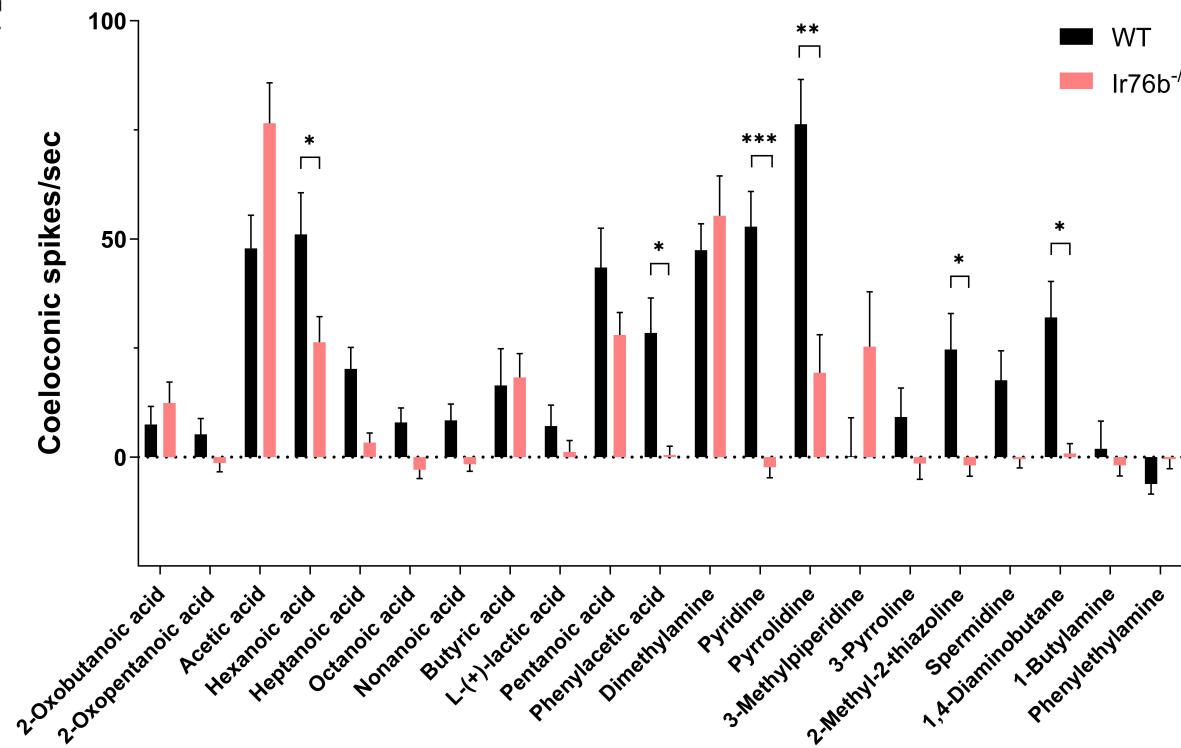**D**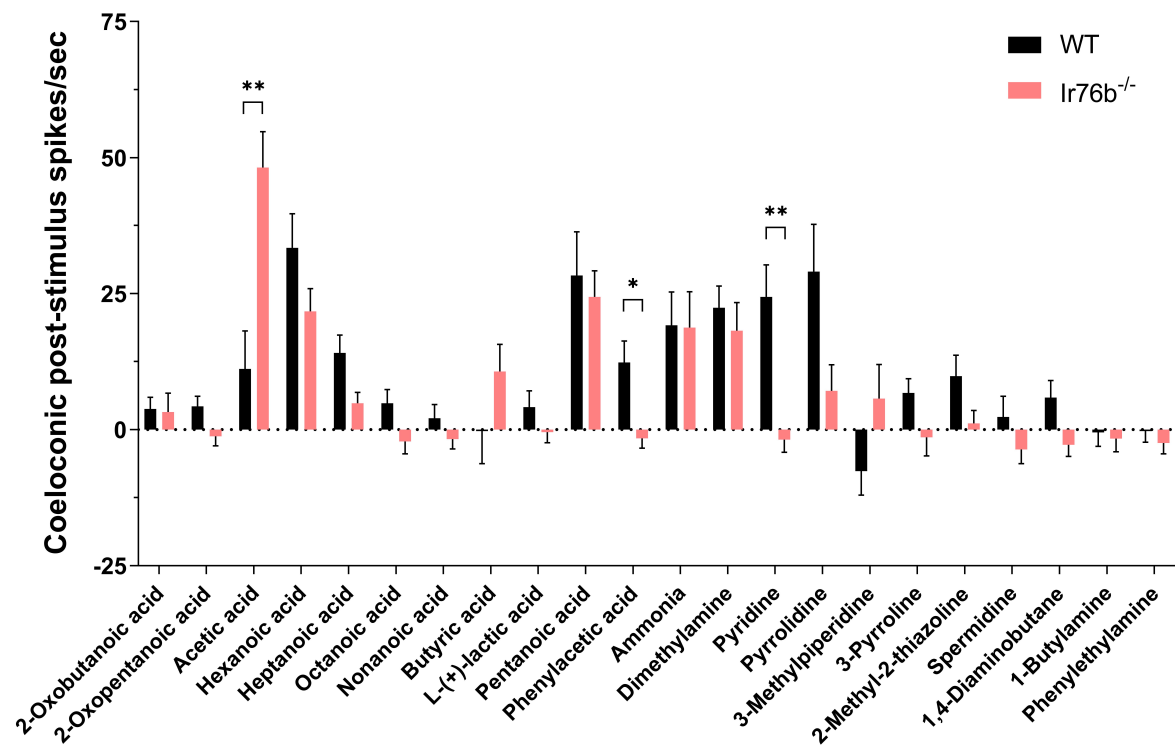

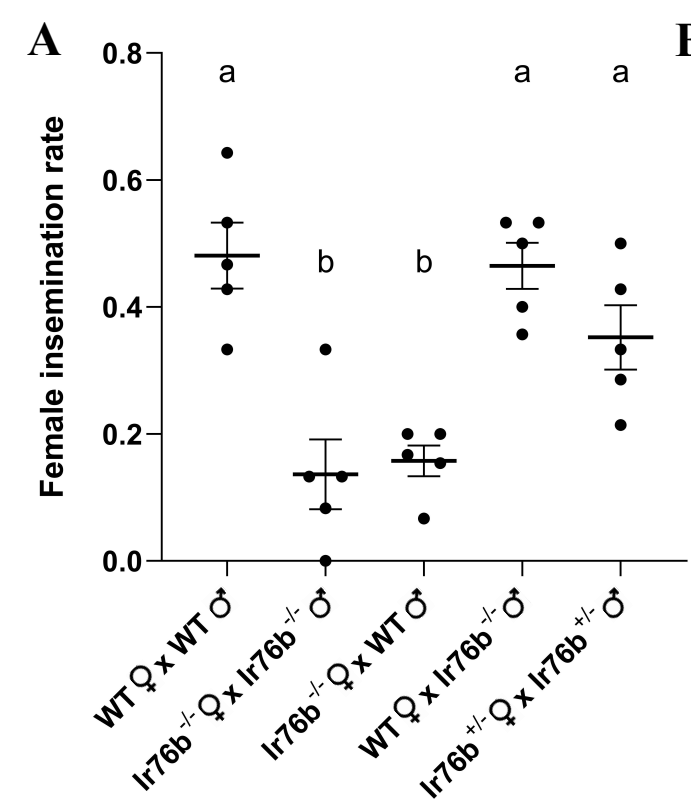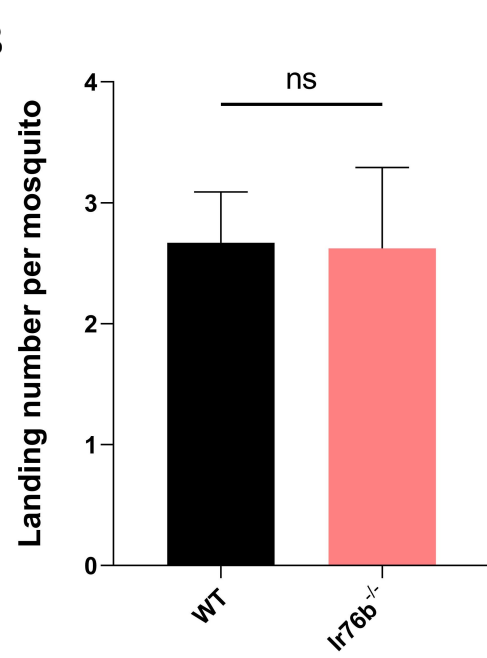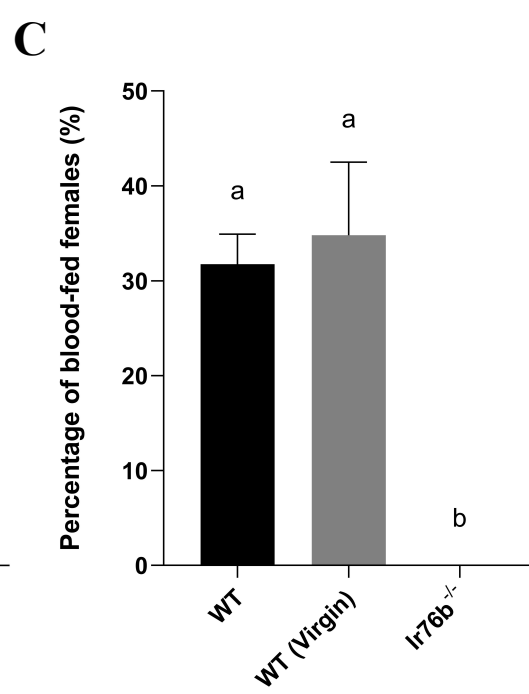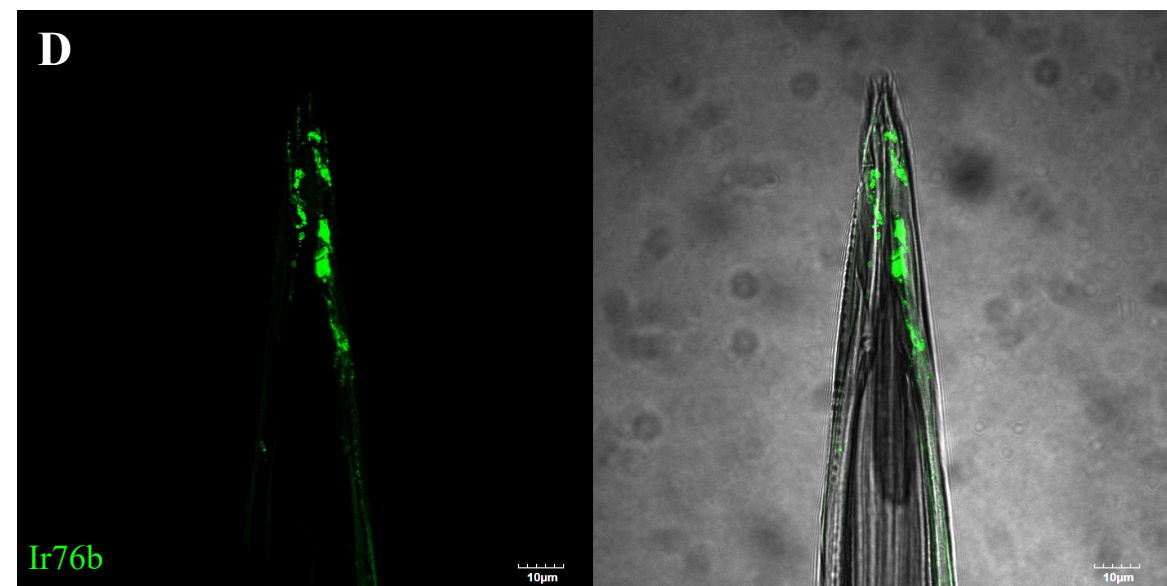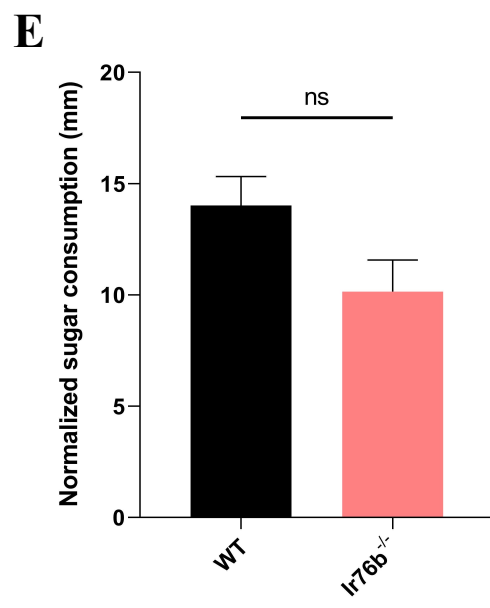

Source: https://www.biorxiv.org/content/10.1101/2021.07.05.451160v1.full.pdf
